## 1 An Atlas of Human and Murine Genetic Influences on Osteoporosis

2  
3 John A. Morris<sup>1,2§</sup>, John P. Kemp<sup>3,4§</sup>, Scott E. Youtten<sup>5</sup>, Laetitia Laurent<sup>2</sup>, John G. Logan<sup>6</sup>, Ryan  
4 Chai<sup>5</sup>, Nicholas A. Vulpescu<sup>7</sup>, Vincenzo Forgetta<sup>2</sup>, Aaron Kleinman<sup>8</sup>, Sindhu Mohanty<sup>5</sup>, C.  
5 Marcelo Sergio<sup>5</sup>, Julian Quinn<sup>5</sup>, Loan Nguyen-Yamamoto<sup>9</sup>, Aimee Lee Luco<sup>9</sup>, Jinchu Vijay<sup>10</sup>,  
6 Marie-Michelle Simon<sup>10</sup>, Albena Pramatarova<sup>10</sup>, Carolina Medina-Gomez<sup>11</sup>, Katerina  
7 Trajanoska<sup>11</sup>, Elena J. Ghirardello<sup>6</sup>, Natalie C. Butterfield<sup>6</sup>, Katharine F. Curry<sup>6</sup>, Victoria D.  
8 Leitch<sup>6</sup>, Penny C. Sparkes<sup>6</sup>, Anne-Tounsia Adoum<sup>6</sup>, Naila S. Mannan<sup>6</sup>, Davide Komla-Ebri<sup>6</sup>,  
9 Andrea S. Pollard<sup>6</sup>, Hannah F. Dewhurst<sup>6</sup>, Thomas Hassall<sup>3</sup>, Michael-John G Beltejar<sup>12</sup>, Douglas  
10 J Adams<sup>13</sup>, Suzanne M. Vaillancourt<sup>14</sup>, Stephen Kaptoge<sup>15</sup>, Paul Baldock<sup>5</sup>, Cyrus Cooper<sup>16,17,18</sup>,  
11 Jonathan Reeve<sup>19</sup>, Evangelia Ntzani<sup>20</sup>, Evangelos Evangelou<sup>20</sup>, Claes Ohlsson<sup>21</sup>, David  
12 Karasik<sup>22</sup>, Fernando Rivadeneira<sup>11</sup>, Douglas P. Kiel<sup>22,23,24</sup>, Jonathan H. Tobias<sup>25</sup>, Celia L.  
13 Gregson<sup>25</sup>, Nicholas C. Harvey<sup>16,17</sup>, Elin Grundberg<sup>10,26</sup>, David Goltzman<sup>9</sup>, David J. Adams<sup>27</sup>,  
14 Christopher J. Lelliott<sup>27</sup>, David A. Hinds<sup>8</sup>, Cheryl L. Ackert-Bicknell<sup>28</sup>, Yi-Hsiang Hsu<sup>22,23,24</sup>,  
15 Matthew T. Maurano<sup>7</sup>, Peter I. Croucher<sup>5</sup>, Graham R. Williams<sup>6</sup>, J. H. Duncan Bassett<sup>6</sup>, David  
16 M. Evans<sup>3,4##\*</sup>, J. Brent Richards<sup>1,2,14,29##\*</sup>

17  
18 <sup>1</sup> Department of Human Genetics, McGill University, Montréal, Québec, Canada

19 <sup>2</sup> Lady Davis Institute, Jewish General Hospital, McGill University, Montréal, Québec, Canada

20 <sup>3</sup> University of Queensland Diamantina Institute, Translational Research Institute, Brisbane,  
21 Queensland, Australia

22 <sup>4</sup> MRC Integrative Epidemiology Unit, University of Bristol, Bristol, UK

23 <sup>5</sup> Garvan Institute of Medical Research, Sydney, New South Wales, Australia

24 <sup>6</sup> Molecular Endocrinology Laboratory, Department of Medicine, Imperial College London,  
25 London, UK

26 <sup>7</sup> Institute for Systems Genetics, New York University Langone Medical Center, New York, New  
27 York, USA

28 <sup>8</sup> Department of Research, 23andMe, Mountain View, California, USA

29 <sup>9</sup> Research Institute of the McGill University Health Centre, Montréal, Québec, Canada

30 <sup>10</sup> McGill University and Genome Quebec Innovation Centre, Montréal, Québec, Canada

31 <sup>11</sup> Department of Internal Medicine, Erasmus Medical Center, Rotterdam, Netherlands

32 <sup>12</sup> Department of Biomedical Genetics, University of Rochester, Rochester, New York, USA

33 <sup>13</sup> Department of Orthopedics, University of Colorado Anschutz Medical Campus, Aurora,  
34 Colorado, USA

35 <sup>14</sup> Departments of Medicine and Epidemiology, Biostatistics & Occupational Health, McGill  
36 University, Montréal, Québec, Canada

37 <sup>15</sup> Department of Public Health and Primary Care, University of Cambridge, Cambridge, UK

38 <sup>16</sup> MRC Lifecourse Epidemiology Unit, University of Southampton, Southampton, UK

39 <sup>17</sup> NIHR Southampton Biomedical Research Centre, University of Southampton and University  
40 Hospital Southampton NHS Foundation Trust, Tremona Road, Southampton, UK

41 <sup>18</sup> NIHR Oxford Biomedical Research Centre, University of Oxford, Oxford, UK

42 <sup>19</sup> NIHR Musculoskeletal Biomedical Research Unit, Botnar Research Centre, Nuffield  
43 Department of Orthopaedics, Rheumatology and Musculoskeletal Sciences, Oxford, UK

44 <sup>20</sup> Department of Hygiene and Epidemiology, University of Ioannina Medical School, Ioannina,  
45 Greece

46 <sup>21</sup> Department of Internal Medicine and Clinical Nutrition, University of Gothenburg, Gothenburg,  
47 Sweden

48 <sup>22</sup> Institute for Aging Research, Hebrew SeniorLife, Boston, Massachusetts, USA

49 <sup>23</sup> Department of Medicine, Beth Israel Deaconess Medical Center and Harvard Medical School,  
50 Boston, Massachusetts, USA

51 <sup>24</sup> Broad Institute of Harvard and Massachusetts Institute of Technology, Boston,  
52 Massachusetts, USA  
53 <sup>25</sup> Musculoskeletal Research Unit, Department of Translational Health Sciences, University of  
54 Bristol, Bristol, UK  
55 <sup>26</sup> Children's Mercy Hospitals and Clinics, Kansas City, Missouri, USA  
56 <sup>27</sup> Wellcome Trust Sanger Institute, Wellcome Genome Campus, Hinxton, Cambridge, UK  
57 <sup>28</sup> Center for Musculoskeletal Research, Department of Orthopaedics, University of Rochester,  
58 Rochester, New York, USA  
59 <sup>29</sup> Department of Twin Research and Genetic Epidemiology, King's College London, London,  
60 UK  
61  
62 § These authors contributed equally  
63 # These authors contributed equally  
64  
65 \* Address for correspondence:  
66 **J. Brent Richards**  
67 H413, Jewish General Hospital,  
68 3755 Côte Ste Catherine, Montréal, QC, H3T 1E2  
69 CANADA  
70 Email: [brent.richards@mcgill.ca](mailto:brent.richards@mcgill.ca)  
71  
72 **David M. Evans**  
73 University of Queensland Diamantina Institute  
74 Level 8, 37 Kent St  
75 Translational Research Institute  
76 Woolloongabba, QLD, 4201  
77 AUSTRALIA  
78 Email: [d.evans1@uq.edu.au](mailto:d.evans1@uq.edu.au)

79 **Abstract**

80 Osteoporosis is a common debilitating chronic disease diagnosed primarily using bone mineral  
81 density (BMD). We undertook a comprehensive assessment of human genetic determinants of  
82 bone density in 426,824 individuals, identifying a total of 518 genome-wide significant loci, (301  
83 novel), explaining 20% of the total variance in BMD—as estimated by heel quantitative  
84 ultrasound (eBMD). Next, meta-analysis identified 13 bone fracture loci in ~1.2M individuals,  
85 which were also associated with BMD. We then identified target genes from cell-specific  
86 genomic landscape features, including chromatin conformation and accessible chromatin sites,  
87 that were strongly enriched for genes known to influence bone density and strength (maximum  
88 odds ratio = 58,  $P = 10^{-75}$ ). We next performed rapid throughput skeletal phenotyping of 126  
89 knockout mice lacking eBMD Target Genes and showed that these mice had an increased  
90 frequency of abnormal skeletal phenotypes compared to 526 unselected lines ( $P < 0.0001$ ). In-  
91 depth analysis of one such Target Gene, *DAAM2*, showed a disproportionate decrease in bone  
92 strength relative to mineralization. This comprehensive human and murine genetic atlas  
93 provides empirical evidence testing how to link associated SNPs to causal genes, offers new  
94 insights into osteoporosis pathophysiology and highlights opportunities for drug development.

## 95 Introduction

96 Osteoporosis is a common, aging-related disease characterized by decreased bone strength  
97 and consequent increased risk of fracture.<sup>1</sup> Bone mineral density (BMD), the most clinically  
98 relevant risk factor when diagnosing osteoporosis, is highly heritable<sup>2</sup> and is a strong risk factor  
99 for fracture.<sup>3</sup> While there have been no large-scale genome-wide association studies (GWAS)  
100 for fracture to date, previous GWAS for BMD have demonstrated that BMD is a highly polygenic  
101 trait.<sup>2</sup> Recently, we identified 203 loci associated with estimated BMD by measuring quantitative  
102 heel ultrasound (eBMD), explaining 12% of its variance, demonstrating this polygenicity.<sup>4</sup>

103  
104 eBMD is predictive of fracture and is highly heritable (50-80%).<sup>5-9</sup> While BMD measured from  
105 dual-energy X-ray absorptiometry (DXA)-scanning is most often used in clinical settings, our  
106 recent GWAS for eBMD identified 84% of all currently known genome-wide significant loci for  
107 DXA-BMD<sup>4</sup> and effect sizes were concordant between the two traits (Pearson's  $r = 0.69$  for  
108 lumbar spine and 0.64 for femoral neck).<sup>4</sup> The largest GWAS to date for DXA-derived BMD  
109 measures contained only 66,628 individuals.<sup>10</sup> Both ultrasound and DXA-derived BMD are  
110 strongly associated with fracture risk where a standard deviation decrease in either metric is  
111 associated with approximately a ~1.5-fold increase in the risk of osteoporotic fracture,<sup>3,11</sup> and  
112 both traits are highly polygenic.

113  
114 Little is known about how to reliably map associated genomic loci to their causal genes.  
115 However, highly polygenic traits such as bone density offer the opportunity to empirically test  
116 which methods link associated SNPs to genes enriched for causal proteins. Causal proteins can  
117 be identified in human clinical trials when their manipulation by medications leads to changes in  
118 BMD.<sup>2</sup> Another source of causal proteins is Mendelian genetic conditions, which may constitute  
119 human knockouts and can also strongly implicate key genes that underlie bone physiology.<sup>12</sup>  
120 Given a sufficient number of associated loci, the different genomic characteristics that link a  
121 SNP to these causal proteins can be tested. These include genomic landscape characteristics  
122 such as cell-specific 3-dimensional (3D) contact domains, cell-specific open chromatin states,  
123 physical proximity and the presence of coding variation. Furthermore, samples from knockout  
124 mice generated by large-scale programs, such as the International Knockout Mouse Consortium  
125 (IKMC), can be used to identify genes whose deletion results in an abnormal skeletal  
126 phenotype. This rapid-throughput phenotyping data can then be used to determine whether  
127 outlier bone phenotypes are enriched in mice harboring deletions of genes identified by GWAS  
128 in humans.

129  
130 Here, we present the most comprehensive investigation of human and murine genetic  
131 influences on bone density and fracture to date. We not only undertook a GWAS of 426,824  
132 individuals for eBMD in the UK Biobank, explaining 20% of its variance and identifying 301  
133 novel loci, but also identified the genetic determinants of fracture in up to 1.2 million individuals  
134 combining the UK Biobank and 23andMe cohorts. We then assessed the SNP-level and  
135 genomic landscape characteristics that mapped associated SNPs to genes that were enriched  
136 for known bone density proteins. We identified Target Genes that were enriched up to 58-fold  
137 for known causal genes and for genes differentially expressed in *in vivo* osteocytes compared to  
138 bone marrow cell models. Finally, we investigated whether deletion of GWAS-identified genes  
139 resulted in skeletal abnormalities *in vivo* by undertaking rapid-throughput phenotyping of  
140 knockout mice, which included 126 Target Genes. Mice harboring deletions of these 126 Target  
141 Genes were strongly enriched for outlier skeletal phenotypes. A convergence of human genetic,  
142 murine genetic, *in vivo* bone-cell expression and *in vitro* cell culture data all pointed to a role for  
143 *DAAM2* in osteoporosis. This was further investigated by detailed analysis of mice with a  
144 hypomorphic allele of *Daam2*. *Daam2* knockdown resulted in a marked decrease in bone

145 strength and increase in cortical bone porosity. CRISPR/Cas9-mediated edits of *DAAM2* in  
146 osteoblast cell lines demonstrated a reduction in mineralization, compared to un-edited cells.  
147

148 These newly discovered loci will empower future clinical and pharmacological research on  
149 osteoporosis, spanning from a better understanding of its genetic susceptibility to, potentially,  
150 biomarker discovery and drug targets. Moreover, to maximize the utility of these results to the  
151 community, all data are made freely available via web resources (see URLs). Below we  
152 summarize the key results from our investigations.  
153

## 154 Results

### 155 **GWAS for eBMD and Fracture**

156 We selected 426,824 White-British individuals (55% female) for the eBMD GWAS from the UK  
157 Biobank full release ([Online Methods](#), [Table S1](#) and [Figure S1](#)). We analyzed 13,737,936  
158 autosomal and X-chromosomal SNPs for their association with eBMD. Although there was  
159 substantial inflation of the test statistics relative to the null for eBMD ( $\lambda_{GC} = 2.26$ , [Figure S2](#)),  
160 linkage disequilibrium (LD) score regression indicated that the majority of inflation was due to  
161 polygenicity rather than population stratification (LD score regression intercept = 1.06 [0.063],  
162 ratio = 0.017 [0.018]).  
163

164 We identified 1,103 conditionally independent signals (423 novel) at a genome-wide significant  
165 threshold ( $P < 6.6 \times 10^{-9}$  see [Online Methods](#)) mapping to 515 loci (301 novel) ([Table S2](#) and  
166 [Figure 1](#)). Of the conditionally independent lead SNPs at each locus, 4.6% were rare, having a  
167 minor allele frequency (MAF)  $\leq 1\%$ , whereas 9.3% were low-frequency (MAF  $\leq 5\%$  but  $> 1\%$ )  
168 and 86.1% were common (MAF  $> 5\%$ ) ([Figure S3](#) shows the relationship between MAF and  
169 absolute effect size). The average absolute conditional effect sizes for these three categories of  
170 SNPs were 0.14, 0.04 and 0.02 standard deviations, respectively. The total variance explained  
171 by conditionally independent genome-wide significant lead SNPs for eBMD was 20.3%. When  
172 partitioning the variance explained by genome-wide significant lead SNPs into the three MAF  
173 categories, we found that rare variants explained 0.8% of the variance, whereas low-frequency  
174 and common variants explained 1.7% and 17.8% of the variance in eBMD, respectively. We  
175 found strong correlations between effect sizes for eBMD when compared to effect sizes from  
176 the interim release of UK Biobank data ( $r = 0.93$ , [Figure S4](#), [Table S3](#)).  
177

178 We identified 53,184 fracture cases (60% female) and 373,611 controls (54% female), totalling  
179 426,795 individuals in UK Biobank ([Table S1](#)). We assessed 13,977,204 autosomal and X-  
180 chromosomal SNPs for their effects on fracture and identified 14 conditionally independent  
181 signals associated with fracture mapping to 13 loci ([Table S4](#) and [Figure S5](#)). Once again, we  
182 observed inflation of the test statistics, ( $\lambda_{GC} = 1.15$ ). However, this was also likely due to  
183 polygenicity, rather than population stratification (LD score regression intercept = 1.00 [0.008],  
184 ratio = 0.017 [0.038]). Conditionally independent genome-wide significant lead SNPs were  
185 tested for replication in a cohort of research participants from 23andMe, Inc., a personal  
186 genetics company (N = 367,900 cases and 363,919 controls). All 14 SNPs showed strong  
187 evidence of replication ([Table S4](#)). All genome-wide significant fracture SNPs were also found  
188 to be genome-wide significant in their association with eBMD in the expected direction of effect  
189 (i.e. alleles lowering eBMD were related to higher risk of fracture). Further, there was a high  
190 correlation between the effect sizes of eBMD associated variants and their effects on fracture  
191 were highly negatively correlated ( $r = -0.77$  [-0.79, -0.74], [Figure S4](#)).  
192

### 193 **Sex Heterogeneity**

194 To investigate whether the genetic aetiology of eBMD differed between the sexes, we  
195 performed tests of sex heterogeneity across the genome. We identified 45 variants at 7 loci that



196 displayed strong evidence of a sex difference ( $P < 6.6 \times 10^{-9}$ , **Table S5**). Variants at two of these  
197 7 loci did not reach genome-wide significance in males, females or the main eBMD GWAS, and  
198 were therefore not followed up further (**Figure S6** and **Table S5**). Of the five remaining loci  
199 (**Table S5**), we detected evidence of a sex difference at *FAM9B*, a known male-only eBMD  
200 associated locus that may mediate its effect on bone through both serum testosterone levels  
201 and estradiol levels in men.<sup>13,14</sup> Alleles at this locus associated with increased testosterone  
202 levels were also associated with increased eBMD in males only. For the remaining loci, male-  
203 only effects were detected at *FKBP4* and *RNU6ATAC*. *FKBP4* codes for a tetratricopeptide  
204 repeat protein found in steroid receptor complexes that has been implicated in androgen  
205 receptor mediated signalling and function.<sup>15</sup> Variants at the *LOC105370177* (upstream of the  
206 *OPG* gene) and *ABO* loci were associated with eBMD in both sexes, but were more strongly  
207 related in males. Finally, variants within *MCM8* were associated with eBMD in females only  
208 (**Table S6**). The same variants are known to be associated with onset of menopause<sup>16</sup> in the  
209 predicted direction (i.e. alleles which increase age at menopause associate with increased  
210 eBMD). Interestingly, 164 loci that reached genome-wide significance in the main analysis  
211 showed evidence of sex-heterogeneity in effect size far above expectation (164 out of 1106  
212 SNPs had  $P < 0.05$ , **Table S7**). LD score regression analyses suggested that the genetic  
213 architecture influencing male and female eBMD was largely shared but that there were some  
214 significant differences between the sexes ( $r_G = 0.91$ ,  $SE = 0.012$ ,  $P < 0.001$ ).<sup>17</sup> The total number  
215 of genome-wide significant conditionally independent lead SNPs becomes 1,106 mapping to  
216 518 loci when including our sex heterogeneity analyses, however, we focus on results from the  
217 main GWAS for the rest of our study.

218

### 219 **Coding Variants**

220 Most genome-wide significant associations to date have arisen from non-coding variants, which  
221 has made the identification of causal genes difficult.<sup>12</sup> Genetic association signals at coding  
222 variation can more directly highlight a potentially causal gene. We identified 1,237 coding  
223 variants, based on the Variant Effect Predictor<sup>18</sup>, meeting genome-wide levels of significance in  
224 their association with eBMD, prior to conditioning on other the lead SNPs in LD at each locus.  
225 This represents 1.0% of the total count of genome-wide significant variants (**Table S8**). The  
226 average absolute effect size for coding variants was 0.025 standard deviations (interquartile  
227 range: 0.014 – 0.027), which was approximately equal to the absolute effect size for genome-  
228 wide significant common variants. These coding variants do not necessarily directly implicate a  
229 gene but may reflect non-causal associations through linkage disequilibrium with other common  
230 non-coding causal variants.

231

### 232 **Fine-Mapping Associated Loci**

233 In order to map SNPs to potentially causal genes, we first refined the set of associated SNPs at  
234 each locus to a smaller set using two statistical fine-mapping methods, GCTA-COJO<sup>19</sup> and  
235 FINEMAP<sup>20</sup>. These methods identify sets of SNPs based on their conditional independence and  
236 posterior probability for causality, respectively. We generated such sets for each genome-wide  
237 significant autosomal locus by identifying conditionally independent lead SNPs, or those SNPs  
238 having a high posterior probability of causality, as determined by  $\log_{10}$  Bayes factor  $> 3$  (**Figure**  
239 **2a**). Here we refer to the set of “fine-mapped SNPs” as those SNPs achieving either conditional  
240 independence or a high posterior probability for causality.

241

242 Prior to fine-mapping, we identified on average 235 genome-wide significant SNPs per locus.  
243 After this fine-mapping exercise, an average of two conditionally independent SNPs and five  
244 SNPs with a  $\log_{10}$  Bayes factor  $> 3$  remained per locus (**Tables S9** and **S10**). The number of  
245 fine-mapped SNPs per locus ranged between 1 to 81. As a sensitivity test, we also considered a  
246 more lenient inclusion criterion for inclusion of SNPs based on a  $\log_{10}$  Bayes factor  $> 2$ , which

247 resulted in a sharp increase in the average number of SNPs per locus to 27, which in total  
248 comprised 13,742 unique SNPs ([Table S11](#)).

249

### 250 ***Comparing Fine-Mapped SNPs for Biological Activity***

251 Given the large number of associated SNPs per locus, downstream analyses should focus on  
252 those SNPs most likely to have a biological function. We used accessible chromatin sites  
253 surveyed in a relevant cellular context as a proxy for biological activity. We generated ATAC-  
254 seq maps in the human osteosarcoma cell line SaOS-2. SaOS-2 cells possess osteoblastic  
255 features and can be fully differentiated into osteoblast-like cells. We also analyzed DNase I  
256 hypersensitive site (DHS) maps from human primary osteoblasts generated by the ENCODE  
257 project.<sup>21</sup> Both ATAC-seq and DHS data were analyzed using a uniform mapping and peak-  
258 calling algorithm ([Online Methods](#)).

259

260 We then analyzed the fine-mapped SNPs for enrichment of these functional signatures relative  
261 to all SNPs in the 1 Mbp surrounding each genome-wide significant association locus. Fine-  
262 mapped SNPs, including the set of conditionally independent SNPs and SNPs with  $\log_{10}$  Bayes  
263 factors  $> 3$ , were strongly enriched for both missense variants in protein coding regions and  
264 osteoblast accessible chromatin sites ([Figure 3a](#)). As the  $\log_{10}$  Bayes factor threshold  
265 increased, fold-enrichment increased as well ([Figure 3b](#)). This indicates that the fine-mapped  
266 set of SNPs is highly enriched for genomic signatures of function, which can inform the choice  
267 of statistical cut-off for selection of SNPs for follow-up functional studies.

268

### 269 ***Mapping Fine-Mapped SNPs to Target Genes & Enrichment for Positive Control Genes***

270 Human genetic associations have rarely been translated to improved clinical care, primarily  
271 because causal genes at associated loci have not been indisputably identified. We therefore  
272 sought to test which genomic features link associated SNPs to genes known to influence bone  
273 biology in humans. We identified a set of proteins whose perturbation through  
274 pharmacotherapy<sup>2</sup> or Mendelian disease leads to changes in bone density or strength.  
275 Mendelian disease genes were defined as monogenic disorders characterized with altered bone  
276 mass or abnormal skeletal mineralization, osteolysis and/or skeletal fragility or osteogenesis  
277 imperfecta ([Table S12](#)) and constitute an informative human knockout resource.<sup>22</sup> We  
278 considered such proteins to be products of “positive control” genes influencing bone density and  
279 likely critical to bone biology.

280

281 Next, we investigated which genomic features linked the fine-mapped set of SNPs to positive  
282 control genes for bone density. We tested whether positive control genes were enriched among  
283 six types of genomic characteristics that can link a SNP to a gene: 1) Genes that were most  
284 proximal to the fine-mapped set SNPs; 2) Genes that contained fine-mapped SNPs overlapping  
285 their gene bodies; 3) Genes containing fine-mapped SNPs that are coding variants; 4) Genes  
286 identified to be in 3D contact with fine-mapped sets in human osteoblasts or osteocytes through  
287 high-throughput chromatin conformation capture (Hi-C) experiments; 5) The closest gene to  
288 fine-mapped SNPs, which also mapped to ATAC-seq peaks in human osteoblast SaOS-2 cell  
289 lines; and 6) Those genes within 100 kbp of fine-mapped SNPs ([Figure 2b](#) emphasizes the  
290 target gene selection and [Figure 4](#) details this entire pipeline). Coding annotations, ATAC-seq  
291 peaks, and Hi-C interaction peaks were not combined but kept separate to enable different  
292 sources of data to provide converging and confirmatory evidence. Distance from a fine-mapped  
293 SNP to a gene was considering the closer of the 3' and 5' ends, not the transcription start site.  
294 We named these genes “Target Genes” and tested which of the above 6 methods to define  
295 Target Genes was most strongly enriched for positive control genes.

296

297 The set of Target Genes that were most strongly enriched for positive control genes, arose from  
298 genes targeted by SNPs that were conditionally independent and by SNPs identified to be  
299 plausibly causal with a  $\log_{10}$  Bayes factor  $> 3$  (**Table 1 and Table S13**). This set of Target  
300 Genes featured 556 genes total, approximately one gene per locus. All six different methods for  
301 linking these fine-mapped set of SNPs to Target Genes yielded strong enrichment for positive  
302 control genes. The odds ratios ranged from 5.1 (95% CI: 3.0-8.6,  $P = 10^{-11}$ ) for Target Genes  
303 within 100 kbp of the fine-mapped SNPs to an odds ratio of 58.5 (95% CI: 26.4-129.31,  $P = 10^{-75}$ )  
304 for Target Genes closest to fine-mapped SNPs that were in an osteoblast-derived ATAC-seq  
305 peak (**Table 1**). In addition, we used FUMA<sup>23</sup> to assess which pathways from the  
306 WikiPathways<sup>24</sup> database were identified by the set of Target Genes most strongly enriched for  
307 positive control genes. We observed that well known pathways such as Wnt signalling,  
308 endochondral ossification, osteoclast and osteoblast signalling, as well as novel pathways were  
309 highlighted by this approach (**Figure S7**).

310  
311 These results suggest that our Target Gene identification methods lead to strong enrichment for  
312 positive control genes known to be central to bone biology. Such methods may help to prioritize  
313 genes at associated loci for functional testing, which are more likely to influence bone biology  
314 and therefore, have clinical relevance. The full list of mapped Target Genes and the method  
315 through which they were identified is presented in **Table S14**.

### 316 317 **Mapping Fine-Mapped SNPs to Osteocyte-Signature Genes**

318 An alternative method to assess the biological plausibility of Target Genes is to test whether  
319 their expression is enriched in bone cells. Osteocytes are the most abundant cell type in bone  
320 and are key regulators of bone mass, bone formation and bone resorption.<sup>25</sup> We therefore  
321 assessed the transcriptome of primary murine osteocytes derived from three bone types *in*  
322 *vivo*.<sup>26</sup> Genes enriched for expression in osteocytes and expressed in all bone types defined an  
323 osteocyte transcriptome signature.<sup>26</sup> We then tested which of the methods used to identify  
324 eBMD Target Genes resulted in the greatest enrichment for osteocyte-signature genes.

325  
326 Again, we found that Target Genes were strongly enriched for osteocyte signature genes, with  
327 odds ratios for enrichment ranging from 2.1 (95% CI: 1.7-2.5,  $P = 2 \times 10^{-17}$ ) for Target Genes  
328 within 100 kbp of the fine mapped set of SNPs, to 7.4 (95% CI: 3.8-14.5,  $P = 5 \times 10^{-12}$ ) for Target  
329 Genes mapped through fine-mapped coding SNPs (**Table 2 and Table S15 and S16**). This  
330 again suggests our methods result in enrichment for biologically relevant genes.

### 331 332 **A Large-Scale High Throughput Murine Knockout Screening Program**

333 The Origins of Bone and Cartilage Disease (OBCD) program ([www.boneandcartilage.com](http://www.boneandcartilage.com)) is  
334 determining 19 structural and functional parameters in all unselected knockout mouse lines  
335 generated at the Wellcome Trust Sanger Institute for the IKMC and IMPC. These parameters  
336 evaluate bone mineral content (BMC), 3D trabecular and cortical bone structure, bone  
337 mineralization and femoral and vertebral bone strength. To date, the OBCD program has  
338 included the analysis of 126 knockout lines with mutations of Target Genes (**Table S17**). Outlier  
339 phenotypes were defined as structural or strength parameters  $> 2$  standard deviations away  
340 from the reference mean, determined from over 300 age-matched, sex-matched and genetically  
341 identical C57BL/6N wild-type controls (**Online Methods**). We investigated whether deletion of  
342 these 126 Target Genes resulted in enrichment of outlier skeletal phenotypes. Outlier cortical  
343 and trabecular bone phenotypes were more frequent in mice with disruptions of the 126 Target  
344 Genes compared against 526 unselected knockout lines (**Tables S17 and S18**, OR 3.2 [95%  
345 CI: 1.9-5.6],  $P < 0.0001$ ). Therefore, enrichment of abnormal skeletal phenotypes in mice with  
346 disruption of Target Genes provides clear functional validation that our fine-mapping approach  
347 identifies critical and biologically-relevant skeletal genes. Our fine-mapping *in vivo* and *in vitro*



348 data converged to identify *DAAM2* as a highly credible and novel osteoporosis gene, therefore  
349 we undertook detailed analyses of mice with a hypomorphic *Daam2* allele to illustrate the  
350 potential of this approach.

351

### 352 ***In-Depth Characterization of DAAM2***

353 Numerous lines of evidence identified *DAAM2* as an important gene for further functional  
354 investigation. First, a conditionally independent lead SNP, rs2504101, mapped directly to  
355 *DAAM2* ( $P_{\text{conditional}} = 4.3 \times 10^{-10}$ ) and second, fine-mapping revealed two coding missense  
356 variants with high posterior probabilities for causality, rs201229313 in its 19<sup>th</sup> exon ( $\log_{10} \text{BF} =$   
357 3.7), and rs61748650 in its 21<sup>st</sup> exon ( $\log_{10} \text{BF} = 2.5$ ). Third, a rare variant, rs772843886, near  
358 *DAAM2* was suggestively associated with risk of fracture ( $P = 2 \times 10^{-3}$ ). Fourth, the *Daam2*<sup>tm1a/tm1a</sup>  
359 mouse was identified to have an outlier skeletal phenotype in our rapid throughput murine  
360 knockout screening program (**Table S17**). Fifth, although *DAAM2* has not previously been  
361 implicated in osteoporosis, it has been predicted to have a role in canonical Wnt signaling.<sup>27,28</sup>

362

363 To investigate the role of *DAAM2* in bone biology, we first tested its expression in bone cells.  
364 We performed RNA-seq and ATAC-seq experiments in four different human osteoblast cell lines  
365 and found it was expressed in all cell lines (**Online Methods, Figure S8**). Staining experiments  
366 in the SaOS-2 cell line revealed *DAAM2* localized specifically in the cell nuclei (**Figures S9 and**  
367 **S10**). This functional evidence from human bone cells also led us to characterize *Daam2* in  
368 mouse bone cells. *Daam2* was identified as an osteocyte signature gene (**Table S16**) and was  
369 expressed in mouse calvarial osteoblasts and bone marrow-derived osteoclasts (**Table S19**).

370

371 Next using CRISPR/Cas9, we tested the effect on bone mineralization of double-stranded  
372 breaks (DSBs) in the second exon of *DAAM2* in SaOS-2 osteoblast cell lines (**Online**  
373 **Methods**). We found that after 14 days of treatment with osteogenic factors, control cells  
374 transfected with the intact plasmid, but not undergoing an DSB of the *DAAM2* gene, had a 9-fold  
375 increase in mineralization. After the introduction of a DSB in the second exon of *DAAM2*,  
376 induced mineralization was severely impaired (**Figure 5**). These CRISPR/Cas9-based findings  
377 suggest that *DAAM2* influences mineralization capacity in human osteoblasts.

378

379 We next analyzed the skeletal phenotypes of *Daam2*<sup>tm1a/tm1a</sup>, *Daam2*<sup>+tm1a</sup> and wild-type  
380 littermate mice in detail. Adult male *Daam2*<sup>tm1a/tm1a</sup> mice had reduced femur and vertebral bone  
381 mineral content (BMC), while male *Daam2*<sup>+tm1a</sup> and female *Daam2*<sup>tm1a/tm1a</sup> mice also had  
382 reduced vertebral BMC. These changes were accompanied by a small reduction in femur length  
383 in *Daam2*<sup>tm1a/tm1a</sup> mice (males, 2.7%; females, 3.5%). Despite otherwise normal trabecular and  
384 cortical bone structural parameters, cortical porosity was increased in both male and female  
385 *Daam2*<sup>tm1a/tm1a</sup> mice (**Figure S11**).

386

387 Consistent with their increased cortical porosity, *Daam2*<sup>tm1a/tm1a</sup> mice had markedly reduced  
388 bone strength (**Figure 6**) even though all other cortical bone parameters, including BMD, were  
389 normal (**Figure S11**). Bone composition and structure were thus investigated in *Daam2*<sup>tm1a/tm1a</sup>  
390 mice by comparing *Daam2*<sup>tm1a/tm1a</sup> mineralization and biomechanical parameters with values  
391 predicted by linear regression analysis of over 300 wild-type age, sex and genetic background  
392 matched wild-type controls. Measures of bone composition and structure in *Daam2*<sup>tm1a/tm1a</sup> mice  
393 were reduced compared to wild-type mice, and vertebral stiffness was > 2 standard deviations  
394 below that predicted even after accounting for reduced BMC (**Figure 6c and Table S20**). To  
395 investigate the role of *Daam2* on bone turnover, we measured markers of bone resorption  
396 (TRAP) and formation (P1NP) in 10-week-old *Daam2*<sup>tm1a/tm1a</sup> and *Daam2*<sup>+tm1a</sup> mice, and these  
397 did not differ from wild-type (**Figure S12**). Furthermore, primary cultures of bone marrow

398 mononuclear cells from *Daam2*<sup>tm1a/tm1a</sup> mice showed no difference in osteoclastogenesis, and  
399 primary osteoblast mineralization was also similar to wild-type (**Figure S12**).

400  
401 Male *Daam2*<sup>tm1a/tm1a</sup> mice had decreased mineral content per unit matrix protein and increased  
402 carbonate substitution (**Figure S13**). This decrease in mineral to matrix ratio explains the overall  
403 decrease in bone mineral content observed in the absence of a decrease in cortical bone size.  
404 While bone size and geometry play a major role in controlling bone strength, decreases in  
405 mineral to matrix ratio are associated with decreased bone stiffness and decreased bending  
406 moment.<sup>29</sup> These decreases likely contributed to the poor bone composition and structure  
407 observed in the *Daam2*<sup>tm1a/tm1a</sup> mice.

408  
409 Taken together, these data suggest the decreased bone strength in *Daam2*<sup>tm1a/tm1a</sup> mice is not  
410 simply a result of abnormal bone turnover, but also a consequence of increased porosity and  
411 impaired bone composition and structure. If DAAM2 proves to be a tractable drug target, such  
412 an agent would represent a complementary therapeutic strategy for prevention and treatment of  
413 osteoporosis and fragility fracture.

#### 414 415 **Additional Novel Candidate Bone Genes**

416 While *DAAM2* represents the detailed validation of a novel Target Gene and the rapid-  
417 throughput knockout mouse skeletal phenotyping pipeline, we also highlight five additional  
418 eBMD Target Genes that result in contrasting abnormalities of bone structure and strength  
419 when deleted in mice, thus emphasising their functional role in skeletal physiology and  
420 importance for further study.

421  
422 *CBX1* encodes Chromobox 1, a highly conserved non-histone member of the heterochromatin  
423 protein family that mediates gene silencing but has no reported role in the skeleton<sup>30</sup>.  
424 Homozygous deletion of *Cbx1* resulted in embryonic lethality whereas adult heterozygous mice  
425 had increased bone mineral content and trabecular thickness resulting in increased stiffness  
426 and strength (**Table S17, Figure S14**). *CBX1* was identified by five SNPs with log<sub>10</sub> BF<sub>s</sub> > 2  
427 mapping directly to its gene body (**Table S11**) and rs208016 (70 kbp upstream) suggested an  
428 association with fracture (P = 1.5x10<sup>-5</sup>).

429  
430 *WAC* encodes WW Domain Containing Adaptor with Coiled-Coil, a protein of unknown function  
431 that is associated with global developmental delay and dysmorphic features in Desanto-Shinawi  
432 syndrome<sup>31</sup>. Homozygous deletion of *Wac* resulted in prenatal lethality whereas adult  
433 heterozygous mice had increased bone length, mass and strength (**Table S17, Figure S15**).  
434 Seven fine-mapped SNPs mapped proximally or directly to *WAC* (**Table S11**), with two fine-  
435 mapped SNPs, rs17686203 (log<sub>10</sub> BF = 3.1) and rs61848479 (log<sub>10</sub> BF = 3.9) mapping to  
436 *WAC* promoter Hi-C interaction peaks in primary human osteoblasts, and for the latter SNP in  
437 primary human osteocytes (**Table S14**). We also identified rs17753457 (60 kbp downstream)  
438 that had a suggestive association with fracture (P = 4.3x10<sup>-5</sup>).

439  
440 *DSCC1* encodes DNA Replication and Sister Chromatid Cohesion 1, a component of an  
441 alternative replication factor that facilitates binding of proliferating cell nuclear antigen to DNA  
442 during S phase but has no known role in bone<sup>32</sup>. Homozygous knockout mice had reduced  
443 viability and adult *Dscc1*<sup>+/-</sup> heterozygotes had increased bone mineral content and strength  
444 (**Table S17, Figure S16**). *DSCC1* was identified by rs62526622 (log<sub>10</sub> BF = 2.0) mapping to an  
445 intronic *DSCC1* Hi-C promoter interaction peak in primary human osteoblasts. rs546691328  
446 (180 kbp downstream) was also found to have a suggestive association with fracture (P =  
447 2.9x10<sup>-4</sup>).

448

449 *RGCC* encodes Regulator of Cell Cycle, a p53 Target Gene that interacts with polo-like kinase  
450 1, which regulates cell proliferation and apoptosis but has no documented role in the skeleton<sup>33</sup>.  
451 Nevertheless, *Rgcc*<sup>-/-</sup> knockout mice displayed increased bone mineral content and strength  
452 (**Table S17, Figure S17**). *RGCC* was identified by rs145922919 (log<sub>10</sub> BF = 3.3) mapping  
453 approximately 30 kbp upstream of *RGCC* to a Hi-C promoter interaction peak in primary human  
454 osteoblasts and rs545753481 (32 kbp upstream) also had a suggestive association with fracture  
455 ( $P = 3.4 \times 10^{-3}$ ).

456  
457 *YWHAE* encodes Tyrosine 3-Monooxygenase/Tryptophan 5-Monooxygenase Activation Protein,  
458 Epsilon Isoform, a pro-inflammatory cytokine that mediates signal transduction by binding to  
459 phosphoserine-containing proteins. *YWHAE* (14-3-3ε) binds to aminopeptidase N (CD13) to  
460 regulate chondrocyte homeostasis and has been implicated as a novel therapeutic target in  
461 osteoarthritis<sup>34</sup>. Rare *YWHAE* deletions have been reported in Miller-Dieker Lissencephaly  
462 syndrome which includes craniofacial abnormalities and growth retardation together with diverse  
463 neurodevelopmental abnormalities<sup>35</sup>. Consistent with this, homozygous deletion of *Ywhae*  
464 resulted in reduced bone length, and increased bone mass and mineral content resulting in  
465 brittle bones (**Table S17, Figure S18**). *YWHAE* was identified in our target gene approach by  
466 22 SNPs with log<sub>10</sub> BF<sub>s</sub> > 2 (**Table S11**) all mapping directly to *YWHAE* introns and an  
467 additional SNP, rs181451348 (1 kbp downstream) showed suggestive association with fracture  
468 ( $P = 7.1 \times 10^{-5}$ ).

469  
470 *CBX1*, *DSCC1*, *RGCC*, *WAC*, and *YWHAE* represent strong candidates for further in-depth  
471 functional characterization as we have performed for *DAAM2*. Bone composition and structure  
472 screens identified *WAC* and *DSCC1* as femur outliers due to *Wac*<sup>+/-</sup> and *Dsccl1*<sup>+/-</sup> knockout mice  
473 being at least two standard deviations from the expected range (**Figure S19**). Our data also  
474 support functional experiments in human cells as all five genes were expressed in all four  
475 human osteoblast cell lines we profiled with RNA-seq and ATAC-seq (**Online Methods**), except  
476 for *RGCC* which was highly expressed in SaOS-2 with low expression levels in U2OS, MG63,  
477 and HOS, three other human osteoblast cell lines for which we generated RNA-seq data  
478 (**Online Methods**). In addition, we observed suggestive association at each locus with fracture  
479 (**Table S21**), further supporting evidence for these five genes having roles in human bone  
480 biology.

## 481 482 **Discussion**

483 In this, the most comprehensive human and murine study on the genetic determinants of bone  
484 density and fracture performed to date, we have identified a total of 518 genome-wide  
485 significant loci, of which 301 are novel and together explain 20% of the total variance in eBMD.  
486 In a GWAS meta-analysis of up to 1.2 million individuals, 13 fracture loci were identified, all of  
487 which were also associated with eBMD. Taking advantage of the polygenicity of eBMD, we  
488 demonstrated strong biological enrichment for fine-mapped SNPs in bone cell open chromatin.  
489 Using fine-mapped SNPs we found that Target Genes were strongly enriched for genes that are  
490 known to play central roles in bone biology through Mendelian genetics, or as targets for  
491 clinically-validated osteoporosis therapies. High throughput skeletal phenotyping of mice with  
492 deletions of 126 Target Genes revealed enrichment of outlier skeletal phenotypes compared to  
493 analysis of 526 unselected knockout lines. Last, we identified *DAAM2* as a protein with critical  
494 effects on bone strength, porosity and composition. These findings will enable on-going and  
495 future studies to better understand the genomic characteristics that link fine-mapped SNPs to  
496 sets of genes enriched for causal proteins. Further, this comprehensive study of the genetic  
497 variants associated with osteoporosis will provide opportunities for biomarker and drug  
498 development

499

500 The polygenicity of eBMD is striking. Few traits and diseases currently have hundreds of loci  
501 associated at genome-wide levels of significance.<sup>12,36</sup> This has led to a large proportion of total  
502 variance in eBMD being explained by now known genetic determinants, which will facilitate  
503 future exploration of bone biology and enable drug development for osteoporosis.<sup>37</sup> Yet, despite  
504 the large number of genetic and biological inputs into eBMD determination, pharmacological  
505 perturbation of even only one protein identified in our GWAS can have clinically relevant effects.  
506 For example, RANKL inhibition has been shown to increase bone density by up to 21% after ten  
507 years of therapy.<sup>38</sup> Interestingly, the genetic variants near RANKL have small effects on eBMD.  
508 Thus, despite the small effect sizes for most identified variants, these do not necessarily reflect  
509 the effect sizes to be anticipated by pharmacological manipulation of the protein. This is  
510 because common genetic variants tend to have small effects on protein function, whereas  
511 pharmacotherapies tend to have large effects on protein function. Consequently, the dose-  
512 response curve describing the effect of small and large genetic perturbations on eBMD is  
513 needed to decide which proteins to target for drug development.<sup>12</sup>

514  
515 Polygenicity has also improved our statistical power to validate linking an associated locus with  
516 a potentially causal gene. We found that fine-mapped sets of SNPs were able to identify Target  
517 Genes that were strongly enriched for positive control genes—particularly when the approach  
518 implemented relatively simple strategies, such as the nearest gene, or the gene nearest a fine-  
519 mapped SNP in cell-relevant open chromatin. We also observed that fine-mapped SNPs were  
520 often in 3D contact with Target Genes in human osteoblasts and osteocytes. These rich data,  
521 surveying many genomic landscape features provide guidance for investigators attempting to  
522 identify causal genes from GWAS-associated SNPs and all human genetic and murine results  
523 are available for download (see URLs).

524  
525 The marked reduction in bone strength in *Daam2*<sup>tm1a/tm1a</sup> mice, despite minimal changes in bone  
526 morphology and mineral content, indicates that *Daam2*<sup>tm1a/tm1a</sup> mice have abnormal bone  
527 composition and structure, which can be explained in part by increased cortical porosity.  
528 Further, CRISPR/Cas9-mediated knockouts of *DAAM2* in osteoblast cells lines resulted in a  
529 marked reduction in inducible mineralization. Few such genes have been identified and further  
530 investigations will be required to determine whether *DAAM2* represents a tractable drug target  
531 in humans. Nevertheless, previous studies have suggested that *DAAM2* indirectly regulates  
532 canonical Wnt signalling across several developmental processes.<sup>27,28</sup> Using different sources  
533 of data to identify *DAAM2*, allowed for greater confidence in results. While each type of data has  
534 its own biases, these biases are partially orthogonal, and consequently, concordant evidence  
535 from different sources of data increases the quality of the evidence, an approach known as  
536 triangulation.<sup>39</sup>

537  
538 Our GWAS for fracture risk identified 13 loci associated with this common disease. All these loci  
539 have been associated with BMD and/or eBMD, highlighting the importance of BMD as a  
540 determinant of fracture risk, at least in the age range assessed within the UK Biobank. While  
541 BMD-independent loci for fracture likely exist, these were not identified despite a well-powered  
542 study. This suggests that screening for fracture drug targets should also include understanding  
543 the effect of the protein on BMD.

544  
545 Our study has important limitations. First, we have measured eBMD, rather than DXA-derived  
546 BMD, which is typically measured in the clinic. Nonetheless, beyond their phenotypic  
547 correlation, these two traits also demonstrate high genetic concordance in terms of their  
548 genome-wide significant loci, suggesting that the biological properties that underpin these two  
549 traits are similar. Importantly, however, eBMD is a strong predictor of fracture risk in its own  
550 right, and contributes to risk assessment over and above DXA-derived BMD at the hip.<sup>40</sup> While

551 our target gene approach has identified a set of candidate genes enriched for genes with known  
552 effects on bone density, it is important to note that there is no gold-standard set of genes known  
553 to influence BMD. While our rapid throughput mouse knockout program is on-going and will  
554 investigate many of the Target Genes implicated by our study, further efforts will be required to  
555 functionally validate (or exclude) these genes in bone biology. Our target gene approach did not  
556 include human gene expression quantitative trait loci (eQTL) data. This is because the largest  
557 available eQTL experiments for human osteoblasts involve only 95 individuals,<sup>41</sup> and larger  
558 sample sizes with RNA-sequencing data will be required to properly investigate our method of  
559 linking fine-mapped sets of SNPs to genes. Finally, our program was limited to individuals of  
560 White-British genetic ethnicity and the effect of most of the genome-wide significant SNPs in  
561 other populations remains to be assessed. It is likely that on-going studies in non-British  
562 ancestries will address this question.

563  
564 In summary, we have generated an atlas of human and murine genetic influences on  
565 osteoporosis. This comprehensive study has more fully described the genetic architecture of  
566 eBMD and fracture and has identified a set of Target Genes strongly enriched for genes with  
567 known roles in bone biology. We used human genetics, functional genomics, animal models and  
568 genome editing to demonstrate the relevance of this approach, formally known as  
569 triangulation<sup>39</sup>, by identifying *DAAM2*. Disruption of *DAAM2* in mice leads to an increase in  
570 cortical porosity and marked reductions in bone composition and strength, and in human  
571 osteoblasts leads to a decrease in mineralization. This set of Target Genes is expected to  
572 include new drug targets for the treatment of osteoporosis, a common disease for which novel  
573 therapeutic options are a health priority.



## 574 **Online Methods**

### 575 **Curating osteoporosis associated outcomes in the UK Biobank study**

576 During the period from 2006 - 2010, half a million British adults were recruited by the UK  
577 Biobank study (<http://www.ukbiobank.ac.uk/>).<sup>42</sup> Subjects provided biological samples, consented  
578 to physical measurements and answered questionnaires relating to general health and lifestyle.  
579 Ethical approval was granted by the Northwest Multi-Centre Research Ethics Committee, and  
580 informed consent was obtained from all participants prior to participation. Heel bone quality was  
581 evaluated in 487,428 subjects by quantitative ultrasound speed of sound (SOS) and broadband  
582 ultrasound attenuation (BUA) using a Sahara Clinical Bone Sonometer (Hologic Corporation,  
583 Bedford, Massachusetts, USA). Further information regarding the assessment protocols are  
584 publicly available on the UK Biobank website. Participants were initially measured at baseline (N  
585 = 487,428) and had their left calcaneus (N = 317,815), right calcaneus (N = 4,102) or both  
586 calcanei (N = 165,511) measured. A subset of these subjects was followed up at two further  
587 time points (N = 20,104 and N = 7,988), during which both heels were measured. A detailed  
588 description of the ascertainment procedure is provided in **Figure S1**. Prior to quality control,  
589 ultrasound data were available for 488,683 individuals at either baseline and/or follow-up  
590 assessment. To reduce the impact of outlying measurements we first identified subjects that  
591 had both heels measured and removed those with highly discrepant (i.e. left vs. right) SOS  
592 and/or BUA measurements. To achieve this, subjects were stratified by sex and bivariate scatter  
593 plots comparing left and right heel measures of SOS and BUA were generated separately.  
594 Outliers were identified by manual inspection and removed. The same method was used to  
595 identify and remove individuals with highly discordant SOS v BUA measured for each heel.  
596 Strict quality control was thereafter applied to male and female subjects separately using the  
597 following exclusion thresholds: SOS [Male: ( $\leq 1,450$  and  $\geq 1,750$  m/s), Female ( $\leq 1,455$  and  $\geq$   
598  $1,700$  m/s)] and BUA [Male: ( $\leq 27$  and  $\geq 138$  dB/MHz), Female ( $\leq 22$  and  $\geq 138$  dB/MHz)].  
599 Individuals exceeding the threshold for SOS or BUA or both were removed from the analysis.  
600 Estimated bone mineral density [eBMD, (g/cm<sup>2</sup>)] was derived as a linear combination of SOS  
601 and BUA (i.e.  $eBMD = 0.002592 * (BUA + SOS) - 3.687$ ). Individuals exceeding the following  
602 thresholds for eBMD were further excluded: [Male: ( $\leq 0.18$  and  $\geq 1.06$  g/cm<sup>2</sup>), Female ( $\leq 0.12$   
603 and  $\geq 1.025$  g/cm<sup>2</sup>)]. A unique list of individuals with a valid measure for the left calcaneus (N =  
604 477,380) and/or right (N = 181,953) were identified separately across the three time points.  
605 Individuals with a valid right calcaneus measure were included in the final data set when no left  
606 measures were available, giving a preliminary working dataset of N=481,100, (left = 475,724  
607 and right = 5,376) unique individuals. Bivariate scatter plots of eBMD, BUA and SOS were again  
608 visually inspected and 723 additional outliers were removed, leaving a total of 480,377 valid  
609 QUS measures for SOS, BUA and BMD (264,304 females and 216,073 males). The R script  
610 used to curate the raw data is available on request, together with all supporting summary data  
611 and plots. Descriptive statistics of the cohort, after quality control, are detailed in **Table S1**.

612  
613 Fracture cases were identified using two mutually non-exclusive methods: Hospital Episodes  
614 Statistics linked through NHS Digital (<http://content.digital.nhs.uk/hes>) with a hospital-based  
615 fracture diagnosis irrespective of mechanism within the primary (N = 392,292) or secondary (N  
616 = 320,448) diagnosis field, and questionnaire-based self-reported fracture within the past five  
617 years (N = 501,694). We defined a set of International Classification of Diseases codes, 10<sup>th</sup>  
618 revision (ICD10), to separate fracture cases from controls with the Hospital Episodes Statistics  
619 data. We excluded fractures of the skull, face, hands and feet, pathological fractures due to  
620 malignancy, atypical femoral fractures, periprosthetic and healed fracture codes. A full list of  
621 ICD10 codes used can be found in **Table S22**. We did not exclude any self-reported fracture  
622 cases by fracture site, since participants were only asked if they sustained a fracture at ankle,  
623 leg, hip, spine, write, arm, other or unknown. We identified 20,122 fractures using ICD10 codes

624 and 48,818 using questionnaire-based self-reported data. Descriptive statistics of the cohort,  
625 after quality control and ancestry selection, are detailed in [Table S1](#).

626

### 627 **Ancestry assignment**

628 Genotype array data were imputed by the UK Biobank using the Haplotype Reference  
629 Consortium (HRC) panel<sup>43</sup>. A comprehensive description of the imputation protocol is described  
630 elsewhere<sup>44</sup>. A sample of 409,728 White-British individuals was identified centrally by the UK  
631 Biobank, using a combination of self-reported ethnicity and genetic information. However, the  
632 reliance on self-reported information was deemed too conservative and we chose to redefine a  
633 White-British sample (N = 440,414) using genetic information only. We projected the UK  
634 Biobank sample onto the first 20 principal components estimated from the 1000 Genomes  
635 Phase 3 (1000G) project data<sup>45</sup> (where ancestry was known) using FastPCA version 2.<sup>46</sup>  
636 Projections used a curated set of 38,551 LD-pruned HapMap 3 Release 3 (HM3)<sup>47</sup> bi-allelic  
637 SNPs that were shared between the 1000G and UK Biobank datasets (i.e. MAF > 1%, minor  
638 allele count > 5, genotyping call rate > 95%, Hardy-Weinberg P > 1x10<sup>-6</sup>, and regions of  
639 extensive LD removed). Expectation Maximization (EM) clustering (as implemented in R using  
640 EMCluster<sup>48</sup>) was used to compute probabilities of cluster membership based on a finite mixture  
641 of multivariate Gaussian distributions with unstructured dispersion. Eigenvectors 1, 2 and 5  
642 were used for clustering as they represented the smallest number of eigenvectors that were  
643 able to resolve the British 1000G sub-population (GBR) from other ethnicities ([Figure S20](#)).  
644 Twelve predefined clusters were chosen for EM clustering as sensitivity analyses suggested  
645 that this number provided a good compromise between model fit (as quantified by log likelihood,  
646 Bayesian information criterion, and Akaike information criterion) and computational burden  
647 ([Figure S21](#)). UK Biobank participants (N = 440,414) that clustered together with the 1000G  
648 GBR sub-population were termed White-British and used for downstream genetic analyses  
649 ([Figure S22](#)).

650

### 651 **Identification of unrelated samples for LD reference estimation and X chromosome 652 analyses**

653 Genome-wide complex trait analysis (GCTA)<sup>49</sup> was used to construct a genetic relatedness  
654 matrix (GRM) using the White-British sample and a curated set of LD non-pruned HM3  
655 autosomal genome-wide variants (N = 497,687). Unrelated individuals were defined using the  
656 genome-wide relatedness measure defined by Yang *et al.*<sup>49</sup> where the pairwise relatedness  
657 between individuals *j* and *k* ( $A_{jk}$ ) was estimated by:

658

$$A_{jk} = \frac{1}{N} \sum_{i=1}^N \frac{(x_{ij} - 2p_i)(x_{ik} - 2p_i)}{2p_i(1 - p_i)}$$

659

660 where  $x_{ij}$  is the number of copies of the reference allele for the  $i^{\text{th}}$  SNP of the  $j^{\text{th}}$  and  $k^{\text{th}}$   
661 individuals and  $p_i$  is the frequency of the reference allele across the N individuals.

662

663 Two samples of unrelated individuals were defined from the White-British UK Biobank  
664 population: A sample used for X chromosome association analysis (pairwise relatedness < 0.1,  
665 N = 374,559) and a random sample for LD reference estimation (pairwise relatedness < 0.025,  
666 N = 50,000).

667

### 668 **Genome-wide association analysis**

669 A maximum of 426,824 White-British individuals (233,185 females and 193,639 males) with  
670 genotype and valid QUS measures were analyzed ([Table S1](#)). For fracture, a maximum of  
671 426,795 White-British individuals, comprising 53,184 fracture cases (60% female) and 373,611

672 controls (54% female) were analyzed. We note that the sample sizes between the two assessed  
673 traits are similar but different, due to not all fracture cases and controls having eBMD measured,  
674 and vice-versa. We tested autosomal genetic variants for association with eBMD and fracture,  
675 separately, assuming an additive allelic effect, using a linear mixed non-infinitesimal model  
676 implemented in the BOLT-LMM v2 software package<sup>50</sup> to account for population structure and  
677 cryptic relatedness. The following covariates were included as fixed effects in all models: age,  
678 sex, genotyping array, assessment center and ancestry informative principal components 1 to  
679 20. Autosomal analysis was restricted to up to 13,977,204 high quality HRC imputed variants  
680 with a MAF > 0.05%, minor allele count > 5, info score > 0.3, genotype hard call rate > 0.95, and  
681 Hardy-Weinberg equilibrium  $P > 1 \times 10^{-6}$ . We also analyzed the association between eBMD and  
682 fracture and directly genotyped SNPs on the X chromosome, adjusting for the same covariates,  
683 using the Plink2 (October 2017) software package<sup>51</sup> and a nested sample of unrelated  
684 participants (N = 362,926 for eBMD and N = 45,087 cases and 317,775 controls for fracture). As  
685 the analyses for the X chromosome data were based upon observed genotypes, we excluded  
686 SNPs with evidence of deviation from Hardy-Weinberg Equilibrium ( $P < 1 \times 10^{-6}$ ), MAF < 0.05%,  
687 minor allele count  $\leq 5$ , and overall missing rate > 5%, resulting in up to 15,466 X chromosome  
688 SNPs for analysis. Heterogeneity in effect size coefficients between sexes was tested in  
689 EasyStrata<sup>52</sup>, using Cochran's test of heterogeneity<sup>53</sup>

$$X_{het} = \sum_i [(\beta_i - \beta_{overall})^2 w_i] \sim \chi^2(m - 1)$$

690

691  $\beta_i$  effect size estimates of stratum  $i$

692  $SE_i$  standard error of stratum  $i$

$$w_i = 1/SE_i^2$$

693  $i = 1..m$

694

695 Manhattan plots of our genome-wide association scans were generated using the same  
696 software. We have previously estimated the genome-wide significance threshold  $\alpha = 6.6 \times 10^{-9}$  for  
697 analyzing data from the UK Biobank using the above criteria.<sup>4</sup>

698

### 699 Fracture replication meta-analysis

700 14 genome-wide significant conditionally independent lead SNPs identified from our fracture  
701 analyses were tested for replication in the 23andMe cohort. Genetic associations were tested  
702 against the fracture phenotype on a set of unrelated individuals of European ancestry. Analyses  
703 were adjusted for age, sex, principal components 1 to 5, and the genotyping platform. There  
704 were 367,900 cases and 363,919 controls. Meta-analysis of UK Biobank discovery and  
705 23andMe replication data was performed using METAL.<sup>54</sup> In order to compare the effect  
706 estimates and standard errors of the UK Biobank discovery and 23andMe replication data, we  
707 had to transform the UK Biobank discovery effect estimates and standard errors as per the  
708 manual specifications in the BOLT-LMM<sup>50</sup> documentation, specifically:

$$\log OR = \frac{\beta}{\mu * (1 - \mu)}$$

709 where  $\mu$  = case fraction and standard errors of SNP effect estimates should also be divided by  
710  $(\mu * (1 - \mu))$ .

711

### 712 Approximate conditional association analysis

713 To detect multiple independent association signals at each of the genome-wide significant  
714 eBMD and fracture loci, we applied approximate conditional and joint genome-wide association  
715 analysis using the software package GCTA v1.91.<sup>19</sup> Variants with high collinearity (multiple  
716 regression  $R^2 > 0.9$ ) were ignored and those situated more than 20 Mbp away were assumed to

717 be independent. A reference sample of 50,000 unrelated White-British individuals randomly  
718 selected from the UK Biobank was used to model patterns of linkage disequilibrium (LD)  
719 between variants. The reference genotyping dataset consisted of the same variants assessed in  
720 our GWAS. Conditionally independent variants reaching genome-wide significance were  
721 annotated to the physically closest gene using Bedtools v2.26.0<sup>55</sup> and the hg19 gene range list  
722 ([www.cog-genomics.org/plink2](http://www.cog-genomics.org/plink2)).

723

### 724 **Estimation of variance explained by significant variants and SNP heritability**

725 We estimated the proportion of eBMD phenotypic variance tagged by all SNPs on the  
726 genotyping array (i.e. the SNP heritability) using BOLT-REML<sup>50</sup> and Linkage Disequilibrium  
727 Score Regression (LDSC)<sup>56</sup>. To calculate the variance explained by independent genome-wide  
728 significant SNPs, i.e. all 1,103 genome-wide significant conditionally independent lead SNPs,  
729 we summed the variance explained per SNP using the formula:  $2p(1 - p)\beta^2$ , where  $p$  is the  
730 effect allele frequency and  $\beta$  is the effect of the allele on a standardized phenotype (mean = 0,  
731 variance = 1).<sup>57-59</sup>

732

### 733 **Estimating genomic inflation with LD Score Regression (LDSC)**

734 To estimate the amount of genomic inflation present in the data that was due to residual  
735 population stratification, cryptic relatedness, and other latent sources of bias, we used stratified  
736 LDSC<sup>60</sup> in conjunction with partitioned LD scores that were calculated for high quality HM3  
737 SNPs derived from a sample of unrelated 1000G EUR individuals.

738

### 739 **Fine-Mapping SNPs**

740 Fine-mapped SNPs were defined as those being conditionally independent, as identified by  
741 GCTA-COJO or exceeding our threshold for posterior probability of causality, as defined by  
742 FINEMAP. Here we describe the generation of this set of fine-mapped SNPs.

743

744 First, SNPs were defined as being conditionally independent using GCTA-COJO.<sup>19,20</sup> We next  
745 calculated the posterior probability of causality. To do so, we defined each conditionally-  
746 independent lead SNP as a signal around which, we would undertake posterior probability  
747 testing. We used all imputed SNPs within 500 kbp of a conditionally independent lead SNP and  
748 treated each signal independently. We used FINEMAP<sup>20</sup>, which approximates, per input region,  
749 genotype-phenotype data with correlation matrices and summary statistics, and then  
750 implements a shotgun stochastic search algorithm to test causal configurations of SNPs rapidly  
751 and identify the most likely number of causal SNPs per signal in a Bayesian framework. We  
752 generated correlation matrices for each fine-mapped region from a subset of randomly selected  
753 50,000 White-British UK Biobank participants with the LDSTORE software<sup>61</sup>. FINEMAP was run  
754 with default parameters except for the number of maximum causal configurations tested, which  
755 we set to 10.<sup>20</sup> For the causal configuration with the highest posterior probability, each SNP was  
756 assigned a  $\log_{10}$  Bayes factor as a measure of its posterior probability for being in the causal  
757 configuration. For example, if a tested region had a causal configuration of six SNPs with the  
758 highest posterior probability, all tested SNPs were assigned a Bayes factor for their marginal  
759 posterior probabilities of being in that causal configuration. Based on this information we  
760 constructed our sets of fine-mapped SNPs, including only the SNPs with the highest posterior  
761 probabilities. After testing each signal at a locus, the set of fine-mapped SNPs were collapsed  
762 into the same locus, due to the high amount of redundancy between credible sets for each  
763 signal, given that the approximation of genotype-phenotype data with correlation matrices and  
764 summary statistics implemented by FINEMAP is identical to GCTA-COJO.<sup>19,20</sup> We used a  $\log_{10}$   
765 Bayes factor > 3 threshold to only consider SNPs with the strongest posterior probabilities for  
766 causality, and those SNPs that were identified as genome-wide significant conditionally  
767 independent lead SNPs, as being fine-mapped SNPs.



768

### 769 **RNA sequencing for mouse osteocytes**

770 We performed an analysis of whole transcriptome sequencing data of three distinct bone types  
771 from the mouse skeleton to measure osteocyte expression<sup>4</sup>. The three sites were the tibia,  
772 femur and humerus, and in each, the bone marrow was removed (N = 8 per site). The  
773 distribution of normalized gene expression for each sample was used to calculate a threshold of  
774 gene expression<sup>62</sup>, with genes above this threshold for 8 out of 8 replicates in any bone type  
775 deemed to be expressed. Osteocyte enriched genes were determined by comparing the  
776 transcriptomes of matched bone sample controls, one with the marrow removed and the other  
777 with the marrow left intact (N = 5 per site). Genes significantly enriched in osteocytes and  
778 expressed in all bone types were defined as osteocyte transcriptome signature genes.

779

### 780 **Mapping accessible chromatin**

781 ATAC-seq libraries were generated by the McGill University and Genome Quebec Innovation  
782 Centre on 100,000 SaOS-2 cells, using a modified protocol to that previously described<sup>63</sup>. The  
783 modifications included: reducing the transposase reaction volume from 50  $\mu$ l to 25  $\mu$ l, increasing  
784 the transposase concentration from 1x to 40x, and using 12 cycles of PCR to enrich each  
785 library. Libraries were quantified by Q-PCR, Picogreen and LabChip, then were sequenced on  
786 the Illumina HiSeq 2500 to 125 bp in pair-ended mode, using the Nextera sequencing primers.  
787 DNase-seq data from primary osteoblast samples<sup>21</sup> were obtained from <http://encodeproject.org>  
788 under accessions ENCLB776DWN and ENCLB906BCL.

789

790 Reads were processed using a uniform pipeline to produce both ATAC-seq and DNase-seq  
791 peaks. Illumina adapters were trimmed using Trimmomatic v. 0.36<sup>64</sup>. Reads were aligned to the  
792 hg38 human reference using BWA v.0.7.15<sup>65</sup>. Peak calling was performed using hotspot2  
793 (<https://github.com/Altius/hotspot2>) with a cutoff of 1% FDR and converted to hg19 reference  
794 coordinates using UCSC liftOver.

795

### 796 **RNA sequencing for human osteoblast cell lines**

797 RNA library preparations were carried out on 500 ng of RNA from SaOS-2, U2OS, MG63 and  
798 HOS cells with RNA integrity number (RIN) > 7 using the Illumina TruSeq Stranded Total RNA  
799 Sample preparation kit, according to manufacturer's protocol. Final libraries were analyzed on a  
800 Bioanalyzer and sequenced on the Illumina HiSeq4000 (pair-ended 100 bp sequences). Raw  
801 reads were trimmed for quality (phred33  $\geq$  30) and length (n  $\geq$  32), and Illumina adapters were  
802 clipped off using Trimmomatic v. 0.35<sup>64</sup>. Filtered reads were aligned to the GRCh37 human  
803 reference using STAR v. 2.5.1b<sup>65</sup>. Raw read counts of genes were obtained using HTseq-count  
804 v.0.6.1<sup>66</sup>.

805

### 806 **RNA sequencing for murine calvarial osteoblasts**

807 We used whole transcriptome sequencing on mouse osteoblasts post-differentiation to obtain  
808 expression profiles of the maturing osteoblast<sup>4</sup>. We obtained pre-osteoblast-like cells from the  
809 neonatal calvaria of C57BL/6J mice carrying a Cyan Fluorescent Protein (CFP) transgene under  
810 the control of the *Col* 3.6 kbp promoter<sup>67</sup>. Specifically, we removed cells not expressing CFP by  
811 FACS sorting after culturing for four days in growth media. The remaining cell set was  
812 considered enriched for pre-osteoblast cells and was re-plated and subjected to an osteoblast  
813 differential cocktail, with RNA being collected every two days from days two to 18 post-  
814 differentiation. We used whole transcriptome sequencing with three technical replicates per  
815 sample and calculated a normalized expression level per gene.

816

### 817 **High-throughput chromosome conformation capture**



818 High-throughput chromosome conformation capture (Hi-C) was performed on primary human  
819 osteoblasts and osteocytes from human bone biopsies of non-fracture subjects. Hi-C libraries  
820 were prepared as described previously.<sup>68</sup> Instead of using HindIII restriction enzyme, we used  
821 DpnII<sup>69</sup> which increased coverage and insensitivity of CpG methylation<sup>70</sup>. The Hi-C libraries  
822 were sequenced on Illumina HiSeq4000 instruments to 2 billion pair-end reads. Biological  
823 replicates were independently generated and sequenced. HiC-Pro was used to process the  
824 HiC-Pro pipeline<sup>71</sup> beginning with aligning each read end to hg38 reference genomes. The  
825 Chimeric read ends were filtered to keep only 5' alignments with MAPQ > 10, and then read-  
826 ends were paired and de-duplicated. Contact matrices were constructed, and significant  
827 interactions were estimated with Homer,<sup>72</sup> GOTHiC<sup>73</sup> and Juicer.<sup>74</sup> We defined significant  
828 interactions as  $P < 10^{-15}$  (comparing observed interactions to estimated expected interactions  
829 and taking into account DNA fragment size, GC content, and other genomic features). Only  
830 interaction pairs that were significant ( $P < 10^{-15}$ ) from all three tools were considered significant.  
831 The resolution of Hi-C interactions was from 1.5 to 2 kbp with average 1.8 kbp. ATAC-seq  
832 experiments were also performed in primary osteoblasts and osteocytes that were used for HI-C  
833 experiments. We only considered and reported chromatin interactions that mapped to open  
834 chromatin

835

### 836 **Target Gene identification**

837 We identified Target Genes for the autosomal fine-mapped sets by annotating fine-mapped sets  
838 of SNPs to the closest protein-coding gene, making additional note if the SNP mapped directly  
839 to the gene's introns or exons, or was coding. We identified Target Genes on the X  
840 chromosome by the closest gene to a conditionally independent lead SNP, as we did not  
841 calculate  $\log_{10}$  Bayes factors for SNPs on the X chromosome. Additionally, we annotated Target  
842 Genes that may be functional in bone cells by marking which fine-mapped SNPs mapped to  
843 open chromatin in human bone cells, identified by SaOS-2 ATAC-seq peaks, and we mapped  
844 chromosomal positions of fine-mapped SNPs to significant Hi-C interactions of primary  
845 osteoblast and osteocytes. When the interaction chromatin mapped to multiple isoforms of  
846 protein coding genes, we selected the one with the most significant interaction (usually with  
847 highest interaction counts). When the interaction chromatin mapped to multiple bins, we  
848 selected the one(s) with looping domains. We further annotated Target Genes using the  
849 osteocyte signature gene set where genes within this set are enriched for osteocyte activity.<sup>4</sup>

850

### 851 **Target Gene enrichment analyses**

852 We performed a series of enrichment analyses by calculating the odds of Target Genes being  
853 either positive control genes or osteocyte signature genes. We identified a set of 57 proteins  
854 whose perturbation through pharmacotherapy,<sup>2</sup> or Mendelian disease leads to changes in bone  
855 density, monogenic disorders presenting with abnormal skeletal mineralization or low bone  
856 mass, osteolysis and/or skeletal fragility and osteogenesis imperfecta and abnormal skeletal  
857 mineralization (**Table S12**).<sup>22</sup> For all protein-coding genes in the genome, which were identified  
858 using refGene (N = 19,455), we annotated whether they were found to be Target Genes and/or  
859 positive control genes. These annotations allowed us to construct contingency tables and  
860 calculate an odds ratio for enrichment of Target Genes amongst positive control genes. We  
861 used multiple genomic features to test which methods of identifying Target Genes enriched for  
862 positive control genes. To do so, we tested if positive control genes were enriched amongst  
863 targeted genes identified by four different methods: 1) Genes that were most proximal to the  
864 fine-mapped set SNPs; 2) Genes that contained fine-mapped SNPs overlapping their gene  
865 bodies; 3) Genes containing fine-mapped SNPs that are coding variants; 4) Genes identified to  
866 be in 3D contact with fine-mapped sets in human osteoblasts or osteocytes through Hi-C  
867 experiments; 5) The closest gene to fine-mapped SNPs, which also mapped to ATAC-seq  
868 peaks in human osteoblast SaOS-2 cell lines; and 6) Those genes within 100 kbp of fine-

869 mapped SNPs (**Figures 2 and 4**). We then repeated this analysis using the osteocyte signature  
870 gene set (N = 1,240) instead of the positive control set, to calculate the odds of Target Genes  
871 being active in the osteocyte.

872

### 873 **Target Gene pathway analysis**

874 We used the Functional Mapping and Annotation of GWAS tool (FUMA)<sup>23</sup> to annotate our lists  
875 of Target Genes for their most enriched biological pathways with data from the WikiPathways<sup>24</sup>  
876 database. WikiPathways is an openly curated database for biological pathways and provides  
877 information on the roles of specific genes or proteins in their respective pathways. FUMA uses  
878 WikiPathways data to compare a list of given genes against a background gene set (e.g. all  
879 protein coding genes) with hypergeometric testing. The output is then a list of enriched  
880 biological pathways based on the input gene lists. We have presented these data graphically in  
881 the **Figure S7**.

882

### 883 **CRISPR/Cas9 Methods**

884 SaOS-2 cells were obtained from ATCC (#ATCC HTB-85) and cultured in McCoy5A medium  
885 (ATCC) supplemented with 15% of FBS (Wisent inc) and 1% of penicillin and streptomycin  
886 (Wisent Inc.) according to the manufacturer. Three different guide RNAs (gRNA) targeting the  
887 second exon of *DAAM2* were cloned in the PX458 plasmid (pSpCas9(BB)-2A-GFP; Addgene  
888 #48138). The gRNA sequences were: gRNA 1-CAGAGGGTGGTTGTCCCGG; gRNA 2-  
889 CAGCCCCATCCCGAACGCAG; and gRNA 3-TGTCCCGGAGGTTGATTTTCG. We observed  
890 the cutting frequency determination (CFD) scores<sup>75</sup> for each gRNA was < 0.1, therefore we did  
891 not consider off-target effects to merit testing<sup>76</sup>. The construct plasmids were purified using the  
892 QIAGEN filter midi prep kit (QIAGEN #12243) according to manufacturer instructions. SaOS-2  
893 cells were cultured to 80% confluence in a 100-mm<sup>2</sup> petri dish. Cells were then transfected with  
894 one of the three different plasmids generated, or with the intact plasmid as a control, using  
895 TransIT LT1 transfection reagent (Mirus #MIR2304) with a reagent-to-DNA ratio of 3:1. 48 hours  
896 post-transfection, GFP positive cells were sorted by FACS in a single cell model. The remaining  
897 colonies were expanded and then assessed for the presence of *DAAM2* protein using  
898 immunofluorescence technique (Anti-*DAAM2* antibody, Sigma-Aldrich #HPA051300). PCR  
899 primers were designed against regions of *DAAM2* flanking the three gRNA target sequences  
900 (forward: 5'-tcctctgtccagATCACAATG-3' and reverse: 5'-ccaagaggagtttgagagatgga-3') to  
901 generate an amplicon of 355 bp. PCR products of the identified clones were sequenced using  
902 MiSeq (Genome Quebec).

903

904 To generate *DAAM2* Western blots (**Figure S23**), total protein was extracted from SaOS-2 cells  
905 using a RIPA buffer. Denatured proteins (20 µg) were separated by 10% sodium dodecylsulfate  
906 (SDS) polyacrylamide gel electrophoresis followed by transfer to nitrocellulose membranes. The  
907 membranes were blocked in 5% skim milk for one hour at room temperature followed by  
908 incubation with an anti-*DAAM2* antibody (Abcam #ab169527) at 1/1,000 overnight at 4°C and  
909 the secondary antibody goat anti-rabbit IgG at 1/10,000 for one hour at room temperature  
910 (Abcam #ab205718). The band densities were quantified by densitometry using Image Lab 5.1  
911 software (Bio-Rad). Protein levels were expressed as a ratio of protein-specific band density  
912 and that of total protein stained using MemCode Staining Solution (ThermoFisher #24580).  
913 **Figure S23** shows that *DAAM2* protein expression was reduced to 17.5% and 33.5% in the  
914 gRNA1 and gRNA2 edited clones, respectively.

915

916 To induce mineralization (**Figure 5**), cells were then cultured to 90% confluence in a 6-well plate  
917 and then treated, or left untreated for a control, with osteogenic factors (Ascorbic acid 50 µg/ml  
918 and β-Glycerophosphate 10 mM). Fresh media containing osteogenic factors was added every  
919 2-3 days over 13 days. At day 14, mineralization was quantified using the osteogenesis assay

920 kit according to manufacturer instructions (Millipore #ECM815). The Alizarin red concentration  
921 ( $\mu\text{M}$ ) was normalized with the protein content assessed in the media in each culture (Pierce  
922 BCA Protein assay kit; Thermo Fisher #23227).

923

#### 924 **Rapid throughput murine knockout program**

925 The Origins of Bone and Cartilage Disease (OBCD) program ([www.boneandcartilage.com](http://www.boneandcartilage.com)) is  
926 undertaking rapid-throughput structural and functional skeletal phenotype analyses of all  
927 unselected knockout mice generated at the Wellcome Trust Sanger Institute as part of the  
928 International Knockout Mouse and International Mouse Phenotyping Consortia (IKMC and  
929 IMPC). Anonymized samples from 16-week-old female wild-type and mutant mice ( $N = 2$  to 6  
930 per mutant genotype) were stored in 70% ethanol and assigned to batches for rapid throughput  
931 analysis. Mice were fed either a Breeder's Chow (Mouse Breeder Diet 5021, 21% kcal as fat,  
932 Labdiet, London, UK) or a Western diet (Western RD, 829100, 42% kcal as fat, Special Diet  
933 Services, Witham, UK) from 4 weeks of age. The relative bone mineral content and length of the  
934 femur and caudal vertebrae are determined by digital X-ray microradiography (Faxitron MX20,  
935  $10\mu\text{m}$  pixel resolution)<sup>77-79</sup>. Micro-CT (Scanco uCT50, 70kV, 200 $\mu\text{A}$ , 0.5mm aluminium filter) is  
936 used to determine trabecular parameters (bone volume BV/TV, trabecular number Tb.N,  
937 thickness Tb.Th, spacing Tb.Sp) at a  $5\mu\text{m}$  voxel resolution in a 1mm region beginning  $100\mu\text{m}$   
938 proximal to the distal femoral growth plate and cortical bone parameters (thickness Ct.Th, BMD,  
939 medullary diameter) at a  $10\mu\text{m}$  voxel resolution in a 1.5mm region centered in the mid-shaft  
940 region 56% along the length of the femur distal to the femoral head.<sup>77,80,81</sup> Biomechanical  
941 variables of bone strength and toughness (yield load, maximum load, fracture load, % energy  
942 dissipated prior to fracture) are derived from destructive 3-point bend testing of the femur and  
943 compression testing of caudal vertebra 6 and 7 (Instron 5543 load frame, 100N and 500N load  
944 cells).<sup>77,79</sup> Overall, 19 skeletal parameters were reported for each individual mouse studied and  
945 compared to reference data obtained from 320 16-week-old wild-type C57BL/6 female mice.  
946 Outlier phenotypes were defined by parameters  $> 2$  standard deviations away from the  
947 reference mean determined from the 320 age, sex and genetically identical C57BL/6N wild-type  
948 controls. Enrichment of outlier skeletal parameters in mice with deletion of eBMD Target Genes  
949 was determined by comparison with the frequency of outlier parameters in 526 unselected  
950 knockout lines using Fisher's Exact Test (Table S18, Prism, GraphPad Software, La Jolla,  
951 USA). The 526 unselected knockout lines were generated by the WTSI and phenotyped by the  
952 OBCD program; these lines included 56 Target Genes. Five Target Genes had previously been  
953 phenotyped in an OBCD pilot study<sup>77</sup> and knockout lines for an additional 65 Target Genes, that  
954 had already been generated by WTSI, were prioritized for rapid-throughput skeletal  
955 phenotyping. In total, our analyses included 596 knockout lines.

956

957 Additional skeletal samples from 16-week-old WT ( $n=5$  female,  $n=5$  male), *Daam2*<sup>+/*tm1a*</sup> ( $n=7$   
958 female,  $n=5$  male) and *Daam2*<sup>*tm1a/tm1a*</sup> ( $n=7$  female,  $n=5$  male) mice were analyzed as described  
959 above. Supplementary cortical bone parameters (total cross-sectional area Tt.Ar, cortical bone  
960 area Ct.Ar, medullary area M.Ar, periosteal perimeter Ps.Pm, endocortical perimeter Ec.Pm,  
961 cortical porosity Ct.Po, polar moment of inertia ( $J$ ) and maximum and minimum moments of  
962 inertia ( $I_{\text{max}}$  and  $I_{\text{min}}$ )) were determined by micro-CT (at  $10\mu\text{m}$  voxel resolution, except for  
963 Ct.Po which was determined at  $1\mu\text{m}$  voxel resolution using the Scanco uCT50 at 70kV, 57 $\mu\text{A}$ ,  
964 0.5mm aluminium filter). Correlation between bone mineral content and biomechanical  
965 parameters was determined by linear regression analysis using 320 16-week-old WT femur and  
966 vertebra samples from C57BL/6 female mice. Bone composition and structure was investigated  
967 in *Daam2*<sup>*tm1a/tm1a*</sup> mice by comparing observed biomechanical parameters with values predicted  
968 by linear regression analysis of femoral and vertebral BMC and biomechanical parameters  
969 obtained from 320 WT age and sex matched controls.

970

## 971 **Daam2 knockout mice**

972 Mouse studies undertaken at the Garvan Institute of Medical Research (Darlinghurst, NSW,  
973 Australia) were approved by the Garvan Institute / St Vincent's Hospital Animal Ethics  
974 Committee in accordance with New South Wales (Australia) State Government legislation.  
975 *Daam2*<sup>tm1a(KOMP)Wtsi</sup> mice (designated *Daam2*<sup>tm1a/tm1a</sup>) were obtained from the Wellcome  
976 Trust/Sanger Institute (Cambridge, UK) where the mice were generated as part of the  
977 International Mouse Phenotyping Consortium (<http://www.sanger.ac.uk/mouseportal>), using ES  
978 cells produced by the Knockout Mouse Project  
979 (<https://www.komp.org/geneinfo.php?Symbol=Daam2>). The *Daam2* gene in these mice was  
980 disrupted by a cassette containing an insertion with an additional splice acceptor site between  
981 exons 5 and 6  
982 (<http://www.mousephenotype.org/data/alleles/MGI:1923691/tm1a%28KOMP%29Wtsi?>). The  
983 success of this strategy was confirmed with an 80% knockdown of *Daam2* in *Daam2*<sup>tm1a/tm1a</sup> and  
984 50% knockdown in *Daam2*<sup>+tm1a</sup>. Age and sex matched 16-week old mice were used for detailed  
985 skeletal phenotyping, as described above.

986

## 987 **In vitro assays of osteoclast formation**

988 Osteoclasts were generated from primary BMCs flushed from mouse long bones of 8-10 week  
989 old WT, *Daam2*<sup>+tm1a</sup> and *Daam2*<sup>tm1a/tm1a</sup> mice, resuspended in MEM/FBS then added (10<sup>5</sup>  
990 cells/well) to 6mm diameter culture wells. These were stimulated with 10, 20, 50 and 100 ng/ml  
991 RANKL, plus 50 ng/mL M-CSF. Medium and cytokines were replaced at day 3, and on day 6  
992 cultures were fixed with 4% paraformaldehyde and histochemically stained for TRAP using as  
993 previously described.<sup>82</sup> TRAP positive multinucleated cells (MNCs) containing 3 or more nuclei  
994 were counted as osteoclasts and quantified under inverted light microscopy.

995

## 996 **In vitro osteoblast mineralization**

997 Plastic-adherent bone marrow stromal cells (BMSCs) were isolated from 8-10 week old WT,  
998 *Daam2*<sup>+tm1a</sup> and *Daam2*<sup>tm1a/tm1a</sup> mice as described previously.<sup>83</sup> Briefly, marrow cells were  
999 flushed from mouse long bones and plated in MEM containing 20% FBS in 25cm<sup>2</sup> tissue culture  
1000 flask. Non-adherent cells were removed by medium changes 3 and 5 days later. After 7 days in  
1001 culture, cells were trypsinized, scraped and re-plated at 3 x 10<sup>4</sup> cells/cm<sup>2</sup> in 24-well plates in  
1002 MEM with 10% FBS containing osteoblast differentiating factors (50 µg/ml ascorbic acid, 2.5nM  
1003 dexamethasone and 10 mM β-glycerolphosphate; Sigma-Aldrich), which was added and  
1004 changed every 3 days for 21 days. Cells were washed with PBS and fixed with 4%  
1005 paraformaldehyde for 15 mins then ethanol (80%) for 30 mins, rinsed and stained with 0.5%  
1006 Alizarin Red (Sigma Aldrich) in water for 30 mins, washed, dried and images of the plates taken  
1007 with a flat-bed scanner (model v800, Epson, North Ryde, NSW Australia). Alizarin red was then  
1008 eluted with 10% cetyl pyridinium chloride (CTP; Sigma-Aldrich) in PBS overnight and quantified  
1009 by measuring 562 nm absorbance (Clariostar plate reader, BMG Labtech, Offenburg, Germany)  
1010 relative to standard alizarin red solutions.

1011

## 1012 **Detection of serum markers of bone resorption and formation**

1013 Serum levels of bone resorption marker tartrate-resistant acid phosphatase (TRAP) and bone  
1014 formation marker procollagen type 1 N-terminal propeptide (P1NP) were measured using a  
1015 Rat/Mouse TRAP enzyme immunoassay kit and a Rat/Mouse P1NP enzyme immunoassay kit  
1016 (Immunodiagnostic Systems, Gaithersburg, MD, USA) respectively.

1017

## 1018 **Fourier-Transform Infrared Spectroscopy**

1019 The humeri from *Daam2* WT, *Daam2*<sup>+tm1a</sup> and *Daam2*<sup>tm1a/tm1a</sup> male and female mice were  
1020 collected at 16 weeks of age. 21 male samples (11 WT, 4 *Daam2*<sup>+tm1a</sup> and 6 *Daam2*<sup>tm1a/tm1a</sup>) and  
1021 19 female samples (8 WT, 5 *Daam2*<sup>+tm1a</sup> and 6 *Daam2*<sup>tm1a/tm1a</sup>) were examined. The bones were



1022 frozen immediately and were kept at a stable temperature until analysis. All bones were  
1023 processed at the same time and all analyzed on the same day to reduce batch effects. The  
1024 humeri were thawed, stripped of soft tissue with epiphyses removed and the marrow cavity was  
1025 flushed. Specimens were then refrozen in liquid nitrogen and pulverized at -80°C using a SPEX  
1026 Sample Prep 6870 Freezer/Mill. Each sample was subjected to three rounds of pulverization at  
1027 15 cycles per second for one minute with a two-minute cool-down between each round. The  
1028 samples were lyophilized under vacuum at -51°C overnight to ensure they were completely  
1029 dehydrated. Anhydrous potassium bromide (KBr) was then added until the final concentration of  
1030 bone in the samples was between 2.50-2.56% by mass. KBr pellets were formed by  
1031 compressing 20 mg of mixed KBr and bone samples in a 7 mm die under 4 tons of force. The  
1032 formed pellets were loaded into a Nicolet iS50 FT-IR spectrophotometer (Thermo Fisher  
1033 Scientific). The collection chamber was continuously purged with dry nitrogen gas to minimize  
1034 noise from moisture and carbon dioxide. Background noise was collected on KBr-only pellets  
1035 and subtracted at the beginning of each cohort or after 30min of continuous measurements  
1036 (whichever occurred first). For each sample, 128 scans between 400-2200  $\text{cm}^{-1}$  (wave numbers)  
1037 were collected at a resolution of 4.0 $\text{cm}^{-1}$  using Happ-Genzel apodization. The wave number  
1038 data was curve fit to absorbance, with baselining and spectral analyses performed using custom  
1039 algorithms and scripts written in the R programming language (R version 3.4.2). The scripts  
1040 were built on top of the ChemoSpec (version 4.2.8) and MESS (version 0.3-2) packages. Local  
1041 minima were used as limits of integration to calculate areas under the curve for the carbonate,  
1042 phosphate and amide I peaks; the mineral to matrix ratio, carbonate to phosphate ratio were  
1043 then calculated using these areas in the appropriate ratios. Collagen maturity and crystallinity  
1044 were calculated from the spectral data using absorbance values at literature-reported and  
1045 validated wavenumbers.<sup>84</sup> Between two and four technical replicates were run for each sample,  
1046 based on the amount of material available. Two samples (both from WT males) were removed  
1047 from all subsequent statistical analyses as the signal to noise ratio was excessive for the  
1048 spectral data for all technical replicates, thus precluding obtaining meaningful information from  
1049 those samples. Values for technical replicates were averaged for each specimen. Differences  
1050 between genotypes were determined by ANOVA, followed by a Tukey's post hoc test. Data from  
1051 male and female mice were analyzed separately.

#### 1052 1053 **URLs**

1054 URLs to download the genome-wide association summary statistics for eBMD and fracture, as  
1055 well as RNA-seq and ATAC-seq data generated for human osteoblast cell lines, will be made  
1056 available after peer-reviewed publication.



## 1057 **Figure Legends**

### 1058 **Figure 1. Manhattan plot of genome-wide association results for eBMD in the UK**

1059 **Biobank.** The dashed red line denotes the threshold for declaring genome-wide significance  
1060 ( $6.6 \times 10^{-9}$ ). 1,103 conditionally independent SNPs at 515 loci passed the criteria for genome-  
1061 wide significance. 301 novel loci (defined as > 1 Mbp from previously reported genome-wide  
1062 significant BMD variants) reaching genome-wide significance are displayed in blue. Previously  
1063 reported loci that reached genome-wide significance are displayed in red, and previously  
1064 reported loci failing to reach genome-wide significance in our study are shown in black.

1066 **Figure 2. Fine-mapping SNPs and target gene selection diagram. A)** For each 500 Mbp  
1067 region around a conditionally independent lead SNP, we applied statistical fine-mapping to  
1068 calculate  $\log_{10}$  Bayes factors for each SNP as a measure of their posterior probability for  
1069 causality. SNPs that were conditionally independent lead SNPs or that had  $\log_{10}$  Bayes factors >  
1070 3 were considered our fine-mapped SNPs that we then used for target gene identification. **B)**  
1071 Target Genes were identified if: 1) It was the gene closest to a fine-mapped SNP. 2) A fine-  
1072 mapped SNP was in its gene body. 3) A fine-mapped SNP was coding. 4) The gene mapped  
1073 closest to a fine-mapped SNP which resided in an SaOS-2 ATAC-seq peak. 5) A fine-mapped  
1074 SNP was present in a Hi-C osteoblast or osteocyte promoter interaction peak, therefore being  
1075 closer to a target gene in three-dimensions than linearly on the genome.

1077 **Figure 3. SNPs at genome-wide significant loci are enriched for osteoblast**  
1078 **open chromatin sites. A)** Odds ratio for missense, osteoblast DHSs and SaOS-2 ATAC-seq  
1079 peaks for SNPs that are conditionally independent or achieving a  $\log_{10}$  Bayes factor > 3. Note  
1080 the  $\log_{10}$  Bayes factor > 3 set contains nearly twice the number of SNPs. **B)** Ranking SNPs by  
1081  $\log_{10}$  Bayes factor (x-axis) shows increasing enrichment of missense SNPs and of SNPs at  
1082 accessible chromatin sites.

### 1084 **Figure 4. Target Gene Identification Workflow.**

1086 **Figure 5. Reduction in DAAM2 protein resulted in decreased mineralization in SaOS-2**  
1087 **cells.** Mineralization quantification in control cells and *DAAM2* exon 2 double-stranded break  
1088 (DSB) induced cells in either the presence of osteogenic factors (treated) or absence  
1089 (untreated). Bars in (a) represent the mean of six independent experiments  $\pm$  SEM from Alizarin  
1090 red staining in (b) to quantify mineralization. \*\*\*  $P < 0.001$  compared to untreated control cells  
1091 and &&&  $P < 0.001$  compared to treated control cells determined by one-way Anova and a  
1092 Bonferroni post-hoc test.

1094 **Figure 6. Biomechanical Analyses of mice with *Daam2* knockdown. A) Femur**  
1095 **biomechanical analysis.** Destructive 3-point bend testing (Instron 5543 load frame) of femurs  
1096 from WT ( $N_{\text{Female}} = 3$ ,  $N_{\text{Male}} = 4$ ), *Daam2*<sup>+/*tm1a*</sup> ( $N_{\text{Female}} = 6$ ,  $N_{\text{Male}} = 4$ ), *Daam2*<sup>*tm1a/tm1a*</sup> ( $N_{\text{Female}} = 5$ ,  
1097  $N_{\text{Male}} = 9$ ) mice. Graphs showing yield load, maximum load, fracture load, stiffness (gradient of  
1098 the linear elastic phase) and toughness (energy dissipated prior to fracture). Data are shown as  
1099 mean  $\pm$  SEM; ANOVA and Tukey's post hoc test; (i) *Daam2*<sup>+/*tm1a*</sup> vs WT and *Daam2*<sup>*tm1a/tm1a*</sup> vs  
1100 WT, \*\* $P < 0.01$ ; \*\*\* $P < 0.001$  and (ii) *Daam2*<sup>+/*tm1a*</sup> vs *Daam2*<sup>*tm1a/tm1a*</sup>, # $P < 0.05$ ; ## $P < 0.01$ ; ### $P < 0.001$ .  
1101 **B) Vertebra biomechanical analyses.** Destructive compression testing (Instron 5543 load  
1102 frame) of caudal vertebrae from WT ( $N_{\text{Female}} = 3$ ,  $N_{\text{Male}} = 4$ ), *Daam2*<sup>+/*tm1a*</sup> ( $N_{\text{Female}} = 6$ ,  $N_{\text{Male}} = 4$ ),  
1103 *Daam2*<sup>*tm1a/tm1a*</sup> ( $N_{\text{Female}} = 5$ ,  $N_{\text{Male}} = 9$ ) mice. Graphs showing yield load, maximum load, and  
1104 stiffness. Data are shown as mean  $\pm$  SEM; ANOVA and Tukey's post hoc test; (i) *Daam2*<sup>*tm1a/tm1a*</sup>  
1105 vs WT, \* $P < 0.05$  and \*\* $P < 0.01$  and (ii) *Daam2*<sup>+/*tm1a*</sup> vs *Daam2*<sup>*tm1a/tm1a*</sup>, # $P < 0.05$ . Females are on  
1106 left and males on right. **C) Bone composition and structure analysis from rapid throughput**  
1107 **screening murine knockouts.** The graph demonstrates the physiological relationship between

1108 bone mineral content and stiffness in caudal vertebrae from P112 female WT mice (N = 320).  
1109 The blue line shows the linear regression ( $P = 0.0001$ ) and the grey box indicates  $\pm 2SD$ . The  
1110 mean value for female *Daam2*<sup>tm1a/tm1a</sup> (N = 2 from initial OBCD screen) mice is shown in orange  
1111 (-2.14 SD).

1112  
1113 **Figure S1. Flow diagram illustrating calcaneal quantitative ultrasound (QUS) data**  
1114 **collection by the UK Biobank.** QUS data were collected at three time points: Baseline (2007 -  
1115 2010), Follow-up 1 (2012 - 2013) and Follow-up 2 (2014 - 2016). At baseline, QUS was  
1116 performed using two protocols (denoted protocol 1 and 2). Protocol 1 was implemented from  
1117 2007 to mid-2009 and involved measuring the left calcaneus. Only in cases where the left was  
1118 missing or deemed unsuitable was the right calcaneus measured. Protocol 2 was introduced  
1119 from mid-2009, (replacing protocol 1) and differed only in that it involved measuring both the left  
1120 and right calcanei. Protocol 2 was further used for both follow up assessments. For all three  
1121 time points, calcaneal QUS was performed with the Sahara Clinical Bone Sonometer [Hologic  
1122 Corporation (Bedford, Massachusetts, USA)]. Vox software was used to automatically collect  
1123 data from the sonometer (denoted direct input). In cases where direct input failed, QUS  
1124 outcomes were manually keyed into Vox by the attending healthcare technician or nurse (i.e.  
1125 manual input). The number of individuals with non-missing measures for speed of sound (SOS)  
1126 and broadband ultrasound attenuation (BUA) recorded at each assessment period are indicated  
1127 in light grey. Further details on these methods are publicly available on the UK Biobank website  
1128 (UK Biobank document #100248  
1129 <https://biobank.ctsu.ox.ac.uk/crystal/docs/Ultrasoundbonedensitometry.pdf>). To reduce the  
1130 impact of outlying measurements, Individuals with highly discordant left vs. right calcaneal  
1131 measures were excluded from the analysis. Furthermore, quality control was applied to male  
1132 and female subjects separately using the following exclusion thresholds: SOS [Male: ( $\leq 1,450$   
1133 and  $\geq 1,750$  m/s), Female ( $\leq 1,455$  and  $\geq 1,700$  m/s)] and BUA [Male: ( $\leq 27$  and  $\geq 138$  dB/MHz),  
1134 Female ( $\leq 22$  and  $\geq 138$  dB/MHz)]. Individuals exceeding the threshold for SOS or BUA or both  
1135 were removed from the analysis. Estimated bone mineral density [eBMD, (g/cm<sup>2</sup>)] was derived  
1136 as a linear combination of SOS and BUA (i.e.  $eBMD = 0.002592 * (BUA + SOS) - 3.687$ ).  
1137 Individuals exceeding the following thresholds for eBMD were further excluded: [Male: ( $\leq 0.18$   
1138 and  $\geq 1.06$  g/cm<sup>2</sup>), Female ( $\leq 0.12$  and  $\geq 1.025$  g/cm<sup>2</sup>)]. The number of individuals with non-  
1139 missing measures for SOS, BUA and eBMD after QC are indicated in black. A unique list of  
1140 individuals with a valid measure for the left calcaneus (N=477,380) and/or right (N=181,953)  
1141 were identified separately across all three time points. Individuals with a valid right calcaneus  
1142 measure were included in the final data set when no left measures were available, giving a  
1143 preliminary working dataset of N=481,100, (left=475,724 and right=5,376) unique individuals.  
1144 Bivariate scatter plots of eBMD, BUA and SOS were visually inspected and 723 additional  
1145 outliers were removed, leaving a total of 480,377 valid QUS measures for SOS, BUA and BMD  
1146 (264,304 females and 216,073 males).

1147  
1148 **Figure S2. QQ plot of GWAS for eBMD.** Results are from the entire genome and not  
1149 conditionally independent SNPs.

1150  
1151 **Figure S3. Relationship between absolute effect size (y-axis) and minor allele frequency**  
1152 **(x-axis) for 1,103 conditionally independent SNPs.** Red dots represent SNPs at previously  
1153 reported BMD loci. Blue dots represent SNPs at novel loci. The named gene is that closest to  
1154 the SNP that has the smallest P-value of all conditionally independent SNPs present in the  
1155 same locus. We emphasize that proximity is not necessarily indicative of causality.

1156  
1157 **Figure S4. Effect size in standard deviations for eBMD (y-axis) from the current UK**  
1158 **Biobank Study plotted against effect size in standard deviations from the previous**

1159 **GEFOS studies for BMD at the (A) femoral neck, (B) lumbar spine, (C) forearm, (D) total-**  
1160 **body, (E) heel and (F) fracture as per the full UK Biobank cohort (x-axis).** Only conditionally  
1161 independent variants that reach genome-wide significance ( $P < 6.6 \times 10^{-9}$ ) for eBMD in the UK  
1162 Biobank are plotted. Minus  $\log_{10}$  P-value for the fracture analysis in UK Biobank is represented  
1163 by the shading of the data points (black for robust evidence of association with fracture and  
1164 white for poor evidence of association). The blue dashed trend line shows a moderate to strong  
1165 correlation between estimated effect sizes at the heel and femoral neck [ $r=0.53$  95%-CI  
1166 (0.49,0.57)], lumbar spine [0.59 (0.55,0.63)], forearm [0.46 (0.41, 0.50)], total-body [0.70  
1167 (0.67,0.73)], interim heel [0.93 (0.92,0.94)] and fracture [-0.77 (-0.79, -0.74)]. SNPs that reach  
1168 genome-wide significance for fracture look-up ( $P < 6.6 \times 10^{-9}$ ) are labelled in black.

1169  
1170 **Figure S5. Manhattan plot of genome-wide association results for fracture in the UK**  
1171 **Biobank.** Manhattan plot showing genome-wide association results for fracture in the UK  
1172 Biobank. The dashed red line denotes the threshold for declaring genome-wide significance  
1173 ( $6.6 \times 10^{-9}$ ). In total, 14 conditionally independent SNPs at 13 loci passed the criteria for genome-  
1174 wide significance in the discovery analysis. Blue dots represent a locus identified from the  
1175 eBMD GWAS that was novel in this analysis. Red dots represent a locus associated with eBMD  
1176 which was known from previous studies. Previously reported BMD loci failing to reach genome-  
1177 wide significance in our study are shown in black.

1178  
1179 **Figure S6. Analysis of sex heterogeneity for eBMD.** The top-most figure is a Miami plot of  
1180 genome-wide association results for females (top panel) and males (bottom panel). The bottom  
1181 graph is a Manhattan plot for the test for sex heterogeneity in eBMD regression coefficients  
1182 between males and females. Previously reported loci that reached genome-wide significance ( $P$   
1183  $< 6.6 \times 10^{-9}$ ) are displayed in red, and previously reported loci failing to reach genome-wide  
1184 significance in our study are shown in black. Loci containing *ABO*, *FKBP4*, *LOC105370177* and  
1185 *FAM9B* had stronger effects on eBMD in males, whereas *MCM8* had a larger effect in females.  
1186 Loci demonstrating significant heterogeneity ( $P < 6.6 \times 10^{-9}$ ) but were not robustly associated at  
1187 genome-wide significance with eBMD in the males and/or females are in green (i.e. *MCCD1* and  
1188 *ZNF398*).

1189  
1190 **Figure S7.** WikiPathways pathway analysis results from FUMA for (A) genes closest to a fine-  
1191 mapped SNP, (B) genes with fine-mapped SNPs mapping to its gene body, (C) genes with  
1192 coding fine-mapped SNPs, (D) genes mapped closest to a fine-mapped SNP which resided in  
1193 an SaOS-2 ATAC-seq peak, and genes identified by fine-mapped SNP was present in a (E) Hi-  
1194 C osteoblast or (F) osteocyte promoter interaction peak. Well known pathways for bone biology  
1195 were highlighted by FUMA, such as Wnt signalling, endochondral ossification, osteoclast and  
1196 osteoblast signalling.

1197  
1198 **Figure S8. Expression of *DAAM2* in osteoblast cell lines from RNA Sequencing**  
1199 **experiments and open chromatin profiles from ATAC-seq experiments.** Blue shows  
1200 forward strand expression, while red shows reverse strand expression. Dark purple shows  
1201 ATAC-seq open chromatin peaks. RNA of *DAAM2* is present in all cell lines, but particularly,  
1202 SaOS-2, HOS and U-2\_OS cell lines.

1203  
1204 **Figure S9: No unspecific labeling of the secondary antibody in the SaOS-2 osteoblast cell**  
1205 **line.** Representative immunofluorescence of SaOS-2 cell lines stained with goat anti-rabbit IgG  
1206 Alexa Fluor 488 secondary antibody (Abcam, ab150077; 1/1000), counterstained with DAPI  
1207 (blue) and observed by confocal microscopy.

1208

1209 **Figure S10. DAAM2 is localized to the nucleus of SaOS-2 osteoblast cell lines.**  
1210 Representative immunofluorescence of SaOS-2 cell lines stained with anti-DAAM2 antibody  
1211 (Sigma Aldrich, HPA051300; 1/200) followed by goat anti-rabbit IgG Alexa Fluor 488 secondary  
1212 antibody (Abcam, ab150077; 1/1000), counterstained with DAPI (blue) and observed by  
1213 confocal microscopy.

1214 **Figure S11. Additional skeletal phenotyping of *Daam2* knockdown at postnatal day 112.**  
1215 **A) Bone mineral content and length.** X-ray microradiography images (Faxitron MX20)  
1216 showing femur and caudal vertebrae from female (left) and male (right) wild-type (WT; female  
1217 n=5, male=5), heterozygous (*Daam2*<sup>+/*tm1a*</sup> female n=7, male n=5) and homozygous  
1218 (*Daam2*<sup>*tm1a/tm1a*</sup>; female n=7, male n= 9) knockout mice. Gray scale images of femur and caudal  
1219 vertebrae are pseudocoloured according to a 16-colour palette in which low mineral content is  
1220 green and high mineral content is pink. Relative frequency plots showing bone mineral content  
1221 in femur and caudal vertebrae from WT, *Daam2*<sup>+/*tm1a*</sup> and *Daam2*<sup>*tm1a/tm1a*</sup> mice; Kolmogorov–  
1222 Smirnov test, \**P*<0.05. Graphs demonstrate femur and caudal vertebra length in WT,  
1223 *Daam2*<sup>+/*tm1a*</sup> and *Daam2*<sup>*tm1a/tm1a*</sup> mice. Data are shown as mean ± SEM; ANOVA and Tukey's  
1224 post hoc test; \**P*<0.05; \*\**P*<0.01. **B) Trabecular bone parameters.** Micro-CT images (Scanco  
1225 MicroCT-50) showing proximal femur trabecular bone from WT, *Daam2*<sup>+/*tm1a*</sup>, *Daam2*<sup>*tm1a/tm1a*</sup>  
1226 mice. Graphs showing trabecular bone volume/tissue volume (BV/TV), trabecular number  
1227 (Tb.N), trabecular thickness (Tb.Th) and trabecular spacing (Tb.Sp). Data are shown as mean ±  
1228 SEM. **C) Cortical bone parameters.** Micro-CT images of mid-diaphysis cortical bone from WT,  
1229 *Daam2*<sup>+/*tm1a*</sup>, *Daam2*<sup>*tm1a/tm1a*</sup> mice. Graphs showing total cross-sectional area inside the  
1230 periosteal envelope (Tt.Ar), cortical bone area (Ct.Ar), cortical area fraction (Ct.Ar/Tt.Ar),  
1231 medullary (marrow cavity) area (M.Ar), periosteal perimeter (Ps.Pm), endocortical perimeter  
1232 (Ec.Pm), cortical thickness (Ct.Th), cortical bone mineral density (BMD), cortical porosity  
1233 (Ct.Po), polar moment of inertia (*J*), maximum moment of inertia (*I*<sub>max</sub>) and minimum moment  
1234 of inertia (*I*<sub>min</sub>). Data are shown as mean ± SEM.

1235  
1236 **Figure S12: Bone resorption and formation are not affected by *Daam2* knockdown.** **A)** No  
1237 difference in the number of bone marrow-derived TRAP+ multinucleated cells was observed  
1238 between WT and *Daam2*<sup>*tm1a/tm1a*</sup> male mice (Scale bar = 100 μM; n = 4; mean ± SEM). **B)** No  
1239 difference was observed in the mineralization of bone marrow stromal cells between WT and  
1240 *Daam2*<sup>*tm1a/tm1a*</sup> mice. No difference in bone resorption marker TRAP **(C)** and bone formation  
1241 marker P1NP **(D)** was detected in the sera of WT and *Daam2*<sup>*tm1a/tm1a*</sup> mice. Data in **(C)** and **(D)**  
1242 are shown as mean ± SEM; Females are on left and males on right.

1243  
1244 **Figure S13. Bone composition of *Daam2* knockdown and wildtype mice.** Bone composition  
1245 was measured in humeri from 16 week old male and female mice by Fourier Transformed  
1246 Infrared Spectroscopy (FTIR). **A)** Mineral to matrix ratio was determined as the ratio of the  
1247 integrated areas of the phosphate peak/amide I peak. **B)** Carbonate substitution was defined as  
1248 the ratio of the integrated areas of the carbonate/phosphate peaks. **C)** Collagen maturity or  
1249 collagen crosslinking was calculated as the ratio of the peak spectral intensities at 1660 and  
1250 1690 cm<sup>-1</sup> respectively. **D)** Crystallinity or crystal maturity was calculated as the ratio of the peak  
1251 spectral intensities at 1030 and 1020 cm<sup>-1</sup> respectively.

1252  
1253 **Figure S14. Increased bone mass, stiffness and strength in adult *Chromobox 1* heterozygous  
1254 deficient mice (*Cbx1*<sup>+/-</sup>) **(a)** X-ray microradiography images of femur and caudal vertebrae from  
1255 female wild-type (WT) and *Cbx1*<sup>+/-</sup> mice at postnatal day 112 (P112). Graphs show reference  
1256 ranges derived from 320 WT mice, mean (solid line), 1.0SD (dotted lines) and 2.0SD (grey box).  
1257 Parameters from individual *Cbx1*<sup>+/-</sup> mice are shown as red dots and mean values as a black line  
1258 (n=2 animals). **(b)** Micro-CT images of proximal femur trabecular bone (left) and mid-diaphysis  
1259**



1260 cortical bone (right). Graphs showing trabecular bone volume/tissue volume (BV/TV), trabecular  
1261 number (Tb.N), trabecular thickness (Tb.Th), trabecular spacing (Tb.Sp), cortical thickness  
1262 (Ct.Th), internal cortical diameter and cortical bone mineral density (BMD). **(c)** Graphs showing  
1263 yield load, maximum load, fracture load, stiffness and energy dissipated prior to fracture derived  
1264 from 3-point bend testing of femurs. **(d)** Graphs showing yield load, maximum load and stiffness  
1265 derived from compression testing of vertebra. Scale bars: a, 1mm and b, 0.5mm.

1266  
1267 **Figure S15.** Increased bone mass and strength in adult *WW Domain Containing Adaptor with*  
1268 *Coiled-Coil* heterozygous deficient mice ( $Wac^{+/-}$ ) **(a)** X-ray microradiography images of femur  
1269 and caudal vertebrae from female wild-type (WT) and  $Wac^{+/-}$  mice at postnatal day 112 (P112).  
1270 Graphs show reference ranges derived from 320 WT mice, mean (solid line), 1.0SD (dotted  
1271 lines) and 2.0SD (grey box). Parameters from individual  $Wac^{+/-}$  mice are shown as red dots and  
1272 mean values as a black line (n=2 animals). **(b)** Micro-CT images of proximal femur trabecular  
1273 bone (left) and mid-diaphysis cortical bone (right). Graphs showing trabecular bone  
1274 volume/tissue volume (BV/TV), trabecular number (Tb.N), trabecular thickness (Tb.Th),  
1275 trabecular spacing (Tb.Sp), cortical thickness (Ct.Th), internal cortical diameter and cortical  
1276 bone mineral density (BMD). **(c)** Graphs showing yield load, maximum load, fracture load,  
1277 stiffness and energy dissipated prior to fracture derived from 3-point bend testing of femurs. **(d)**  
1278 Graphs showing yield load, maximum load and stiffness derived from compression testing of  
1279 vertebra. Scale bars: a, 1mm and b, 0.5mm.

1280  
1281 **Figure S16.** Increased bone mineral content and strength in adult *DNA Replication and Sister*  
1282 *Chromatid Cohesion 1* heterozygous deficient mice ( $Dscc1^{+/-}$ ) **(a)** X-ray microradiography  
1283 images of femur and caudal vertebrae from female wild-type (WT) and  $Dscc1^{+/-}$  mice at  
1284 postnatal day 112 (P112). Graphs show reference ranges derived from 320 WT mice, mean  
1285 (solid line), 1.0SD (dotted lines) and 2.0SD (grey box). Parameters from individual  $Dscc1^{+/-}$  mice  
1286 are shown as red dots and mean values as a black line (n=2 animals). **(b)** Micro-CT images of  
1287 proximal femur trabecular bone (left) and mid-diaphysis cortical bone (right). Graphs showing  
1288 trabecular bone volume/tissue volume (BV/TV), trabecular number (Tb.N), trabecular thickness  
1289 (Tb.Th), trabecular spacing (Tb.Sp), cortical thickness (Ct.Th), internal cortical diameter and  
1290 cortical bone mineral density (BMD). **(c)** Graphs showing yield load, maximum load, fracture  
1291 load, stiffness and energy dissipated prior to fracture derived from 3-point bend testing of  
1292 femurs. **(d)** Graphs showing yield load, maximum load and stiffness derived from compression  
1293 testing of vertebra. Scale bars: a, 1mm and b, 0.5mm.

1294  
1295 **Figure S17.** Increased bone mineral content and strength in adult *DNA Regulator of Cell Cycle*  
1296 knockout mice ( $Rgcc^{-/-}$ ) **(a)** X-ray microradiography images of femur and caudal vertebrae from  
1297 female wild-type (WT) and  $Rgcc^{-/-}$  mice at postnatal day 112 (P112). Graphs show reference  
1298 ranges derived from 320 WT mice, mean (solid line), 1.0SD (dotted lines) and 2.0SD (grey box).  
1299 Parameters from individual  $Rgcc^{-/-}$  mice are shown as red dots and mean values as a black line  
1300 (n=2 animals). **(b)** Micro-CT images of proximal femur trabecular bone (left) and mid-diaphysis  
1301 cortical bone (right). Graphs showing trabecular bone volume/tissue volume (BV/TV), trabecular  
1302 number (Tb.N), trabecular thickness (Tb.Th), trabecular spacing (Tb.Sp), cortical thickness  
1303 (Ct.Th), internal cortical diameter and cortical bone mineral density (BMD). **(c)** Graphs showing  
1304 yield load, maximum load, fracture load, stiffness and energy dissipated prior to fracture derived  
1305 from 3-point bend testing of femurs. **(d)** Graphs showing yield load, maximum load and stiffness  
1306 derived from compression testing of vertebra. Scale bars: a, 1mm and b, 0.5mm.

1307  
1308 **Figure S18.** Increased bone mass and brittle bones in adult *Tyrosine 3-*  
1309 *Monoxygenase/Tryptophan 5-Monoxygenase Activation Protein Epsilon* knockout mice  
1310 ( $Ywhae^{-/-}$ ) **(a)** X-ray microradiography images of femur and caudal vertebrae from female wild-

1311 type (WT) and *Ywhae*<sup>-/-</sup> mice at postnatal day 112 (P112). Graphs show reference ranges  
1312 derived from 320 WT mice, mean (solid line), 1.0SD (dotted lines) and 2.0SD (grey box).  
1313 Parameters from individual *Ywhae*<sup>-/-</sup> mice are shown as red dots and mean values as a black  
1314 line (n=2 animals). **(b)** Micro-CT images of proximal femur trabecular bone (left) and mid-  
1315 diaphysis cortical bone (right). Graphs showing trabecular bone volume/tissue volume (BV/TV),  
1316 trabecular number (Tb.N), trabecular thickness (Tb.Th), trabecular spacing (Tb.Sp), cortical  
1317 thickness (Ct.Th), internal cortical diameter and cortical bone mineral density (BMD). **(c)** Graphs  
1318 showing yield load, maximum load, fracture load, stiffness and energy dissipated prior to  
1319 fracture derived from 3-point bend testing of femurs. **(d)** Graphs showing yield load, maximum  
1320 load and stiffness derived from compression testing of vertebra. Scale bars: a, 1mm and b,  
1321 0.5mm.  
1322

1323 **Figure S19.** Bone composition and structure analysis from rapid throughput screening murine  
1324 knockouts. **(a)** The graphs demonstrate the relationship between bone mineral content and yield  
1325 load, maximum load, fracture load and stiffness in femurs from P112 female WT mice (N = 320).  
1326 For yield load, maximum load, and stiffness the blue line shows the linear regression (P =  
1327 0.005, P < 0.00001, P = 0.003 respectively) and the grey box indicates ± 2SD. For fracture load  
1328 the blue line shows the linear regression (P = 0.00003) and the grey box indicates ± 95%  
1329 confidence intervals. The mean values for *Cbx1*<sup>+/-</sup>, *Dscc1*<sup>+/-</sup>, *Rgcc*<sup>-/-</sup>, *Wac*<sup>+/-</sup> and *Ywhae*<sup>-/-</sup> (N = 2  
1330 from OBCD screen) mice are shown in orange. The *Wac*<sup>+/-</sup> femur yield load was 2.8 SD above  
1331 the wild type reference range and *Dscc1*<sup>+/-</sup> fracture load was on the 1.7<sup>th</sup> centile. **(b)** The graph  
1332 demonstrates the relationship between bone mineral content and yield load, maximum load and  
1333 stiffness in vertebrae from P112 female WT mice (N = 320). For yield and maximum loads the  
1334 blue line shows the linear regression (P = <0.00001) and the grey box indicates ± 95%  
1335 confidence intervals. For stiffness the blue line shows the linear regression (P = 0.0001) and the  
1336 grey box indicates ± 2SD. The mean values for *Cbx1*<sup>+/-</sup>, *Dscc1*<sup>+/-</sup>, *Rgcc*<sup>-/-</sup>, *Wac*<sup>+/-</sup> and *Ywhae*<sup>-/-</sup> (N  
1337 = 2 from OBCD screen) mice are shown in orange.  
1338

1339 **Figure S20. Bivariate scatterplots describing pairwise comparisons of each of the first 20**  
1340 **ancestry informative principal components derived from unrelated subjects of the 1000**  
1341 **Genomes study.** Data points represent subjects that are coloured according to their predefined  
1342 1000 genomes study population\*. Pairwise combinations involving eigenvectors 1,2 and 5  
1343 represented the smallest number of eigenvectors that were able to adequately resolve the  
1344 British sub-population (GBR) from other ethnicities and were subsequently used to for clustering  
1345 and ancestry assignment of the UK Biobank sample. \*CHB=Han Chinese in Beijing, China,  
1346 JPT=Japanese in Tokyo, Japan, CHS=Southern Han Chinese, CDX=Chinese Dai in  
1347 Xishuangbanna, China, KHV=Kinh in Ho Chi Minh City, Vietnam, CEU=Utah Residents (CEPH)  
1348 with Northern and Western European Ancestry, TSI=Toscani in Italia, FIN=Finnish in Finland,  
1349 GBR=British in England and Scotland, IBS=Iberian Population in Spain, YRI=Yoruba in Ibadan,  
1350 Nigeria, LWK=Luhya in Webuye, Kenya, GWD=Gambian in Western Divisions in the Gambia,  
1351 MSL=Mende in Sierra Leone, ESN=Esan in Nigeria, ASW=Americans of African Ancestry in SW  
1352 USA, ACB=African Caribbeans in Barbados, MXL=Mexican Ancestry from Los Angeles USA,  
1353 PUR=Puerto Ricans from Puerto Rico, CLM=Colombians from Medellin, Colombia,  
1354 PEL=Peruvians from Lima, Peru, GIH=Gujarati Indian from Houston, Texas, PJL=Punjabi from  
1355 Lahore, Pakistan, BEB=Bengali from Bangladesh, STU=Sri Lankan Tamil from the UK,  
1356 ITU=Indian Telugu from the UK  
1357

1358 **Figure S21. Evaluating expectation maximization clustering model fit.** The number of  
1359 predefined clusters is described on the x-axis and model fit on the y-axis [Inferred by three  
1360 model selection criteria: i.e. log-likelihood (LogL), Akaike information criteria (AIC), and  
1361 Bayesian information criterion (BIC)]. Twelve predefined clusters were chosen for clustering as

1362 sensitivity analyses suggested that this number provided a good compromise between model fit  
1363 and computational burden (i.e. more clusters requires more computation).

1364

1365 **Figure S22. Bivariate scatterplots describing pairwise comparisons of ancestry**  
1366 **informative principal components 1,2 and 5 derived from unrelated subjects of the 1000**  
1367 **genomes study and all subjects from the UK Biobank sample.** Data points represent  
1368 subjects that are coloured according to their allocated cluster, as estimated by Expectation  
1369 Maximization (EM) clustering. Samples from the UK-Biobank sample are annotated using  
1370 "UKB". Other 1000 genomes populations are annotated using the following: CHB=Han Chinese  
1371 in Beijing, China, JPT=Japanese in Tokyo, Japan, CHS=Southern Han Chinese, CDX=Chinese  
1372 Dai in Xishuangbanna, China, KHV=Kinh in Ho Chi Minh City, Vietnam, CEU=Utah Residents  
1373 (CEPH) with Northern and Western European Ancestry, TSI=Toscani in Italia, FIN=Finnish in  
1374 Finland, GBR=British in England and Scotland, IBS=Iberian Population in Spain, YRI=Yoruba in  
1375 Ibadan, Nigeria, LWK=Luhya in Webuye, Kenya, GWD=Gambian in Western Divisions in the  
1376 Gambia, MSL=Mende in Sierra Leone, ESN=Esan in Nigeria, ASW=Americans of African  
1377 Ancestry in SW USA, ACB=African Caribbeans in Barbados, MXL=Mexican Ancestry from Los  
1378 Angeles USA, PUR=Puerto Ricans from Puerto Rico, CLM=Colombians from Medellin,  
1379 Colombia, PEL=Peruvians from Lima, Peru, GIH=Gujarati Indian from Houston, Texas,  
1380 PJI=Punjabi from Lahore, Pakistan, BEB=Bengali from Bangladesh, STU=Sri Lankan Tamil  
1381 from the UK, ITU=Indian Telugu from the UK.

1382

1383 **Figure S23. Targeting DAAM2 exon 2 with CRISPR/Cas9 induced double stranded breaks**  
1384 **reduced DAAM2 protein level in SaOS-2 cells. A)** DAAM2 protein level quantification in  
1385 control cells and edited DAAM2 cells (gRNA1 and gRNA2). Bars represent the mean of six  
1386 independent experiments  $\pm$  SEM. \*\*\* represent  $P < 0.001$  compared to control cells determined  
1387 by one-way Anova and Bonferroni post-hoc tests. **B)** Bands from representative Western Blots  
1388 of DAAM2 (upper panel) and total protein (lower panel) of at least six independent experiments  
1389 from different cell line passages. Ct: controls; gRNA1: DAAM2 edited cells with gRNA1; gRNA2:  
1390 DAAM2 edited cells with gRNA2.

1391 **Tables**

1392 **Table 1.** Target gene identification methods enrichment for 57 positive control genes. No  
 1393 positive control genes were identified by osteocyte Hi-C interactions therefore we did not  
 1394 calculate its enrichment. Distance to gene was determined using 3' and 5' ends, instead  
 1395 of the transcription start site.  
 1396

| <i>Target Gene Set</i>                  | <i>OR (95% CI)</i>  | <i>P</i>              |
|-----------------------------------------|---------------------|-----------------------|
| <i>SaOS-2 ATAC-seq Peak Gene</i>        | 58.5 (26.4 – 129.3) | 1.3x10 <sup>-75</sup> |
| <i>Coding SNP Gene</i>                  | 41.8 (14.3 – 121.6) | 1.0x10 <sup>-30</sup> |
| <i>Osteoblast Hi-C Interaction Gene</i> | 21.1 (6.4 – 69.6)   | 7.8x10 <sup>-13</sup> |
| <i>Closest Gene</i>                     | 12.9 (7.1 – 23.4)   | 1.8x10 <sup>-27</sup> |
| <i>Overlapping Gene Body</i>            | 11.2 (5.2 – 23.8)   | 3.4x10 <sup>-15</sup> |
| <i>All Genes Within 100 kbp</i>         | 6.8 (3.9 – 11.7)    | 2.1x10 <sup>-15</sup> |
| <i>Osteocyte Hi-C Interaction Gene</i>  | NA                  | NA                    |

1397  
 1398 **Table 2.** Target gene identification methods enrichment for 1,240 osteocyte signature genes.  
 1399 Distance to gene was determined using 3' and 5' ends, instead of the transcription start  
 1400 site.  
 1401

| <i>Target Gene Set</i>                  | <i>OR (95% CI)</i> | <i>P</i>              |
|-----------------------------------------|--------------------|-----------------------|
| <i>Coding SNP Gene</i>                  | 7.4 (3.8 - 14.5)   | 5.2x10 <sup>-12</sup> |
| <i>SaOS-2 ATAC-seq Peak Gene</i>        | 6.1 (3.5 - 10.6)   | 2.6x10 <sup>-13</sup> |
| <i>Overlapping Gene Body</i>            | 5.1 (3.8 - 6.7)    | 1.1x10 <sup>-37</sup> |
| <i>Closest Gene</i>                     | 4.6 (3.7 - 5.6)    | 4.1x10 <sup>-53</sup> |
| <i>Osteoblast Hi-C Interaction Gene</i> | 3.8 (1.9 – 7.4)    | 2.5x10 <sup>-5</sup>  |
| <i>Osteocyte Hi-C Interaction Gene</i>  | 2.9 (1.0 – 8.6)    | 4.0.x10 <sup>-2</sup> |
| <i>All Genes Within 100 kbp</i>         | 2.1 (1.7 - 2.5)    | 1.8x10 <sup>-17</sup> |

1402



## 1403 **Acknowledgments**

1404 This research has been conducted using the UK Biobank Resource (accession IDs: 24268,  
1405 12703 and 4580). J.B.R. was supported by the Canadian Institutes of Health Research, the  
1406 Canadian Foundation for Innovation and the Fonds de Recherche Santé Québec (FRSQ) and a  
1407 FRQS Clinical Research Scholarship. TwinsUK is funded by the Wellcome Trust, Medical  
1408 Research Council, European Union, the National Institute for Health Research (NIHR)-funded  
1409 BioResource, Clinical Research Facility and Biomedical Research Centre based at Guy's and St  
1410 Thomas' NHS Foundation Trust in partnership with King's College London. J.A.M was funded  
1411 by the Canadian Institutes of Health Research. D.M.E. was funded by a National Health and  
1412 Medical Research Council Senior Research Fellowship (APP1137714) and funded by a Medical  
1413 Research Council Programme Grant (MC\_UU\_12013/4). J.P.K was funded by a University of  
1414 Queensland Development Fellowship. CLG was funded by Arthritis Research UK (ref; 20000).  
1415 G.R.W., J.H.D.B. and P.I.C. were funded by the Wellcome Trust (Strategic Award grant number  
1416 101123; project grant 094134) and P.I.C was also funded by the Mrs Janice Gibson and the  
1417 Ernest Heine Family Foundation. D.K. was supported by Israel Science Foundation grant  
1418 #1283/14. Y.-H.H. was funded by US NIH NIAMS 1R01AR072199. F.R., C.M.-G., and K.T. were  
1419 funded by the Netherlands Organization for Health Research and Development (ZonMw VID1  
1420 016.136.361 grant). C.L.A.-B. was funded by NIH/NIAMS AR063702 AR060981. D.P.K. was  
1421 funded by grants from the National Institute of Arthritis Musculoskeletal and Skin Diseases R01  
1422 AR041398, R01 AR072199. S.Y. was funded by the Australian Government Research Training  
1423 Program Scholarship. J.R. and S.K. were funded by the Genetic Factors of Osteoporosis-  
1424 GEFOS EU FP7 Integrated Project Grant Reference: 201865 2008-12 and 2007-12 UK NIHR  
1425 Biomedical Research Centre Grant (Musculoskeletal theme) to Cambridge Clinical School. C.O.  
1426 was supported by the Swedish Research Council, Swedish Foundation for Strategic Research,  
1427 ALF/LUA research grant from the Sahlgrenska University Hospital, Lundberg Foundation,  
1428 European Calcified Tissue Society, Torsten and Ragnar Söderberg's Foundation, Novo Nordisk  
1429 Foundation, Knut and Alice Wallenberg Foundation.

1430  
1431 We thank M. Schull for assistance with high-performance computing at the University of  
1432 Queensland Diamantina Institute, and T. Winkler for invaluable technical support for the  
1433 EasyStrata Software used in this study. We thank the Sanger Institute's Research Support  
1434 Facility, Mouse Pipelines and Mouse Informatics Group who generated the mice and collected  
1435 materials for this manuscript. We would like to thank the research participants and employees of  
1436 23andMe for making this work possible. The following members of the 23andMe Research  
1437 Team contributed to this study: Michelle Agee, Babak Alipanahi, Adam Auton, Robert K. Bell,  
1438 Katarzyna Bryc, Sarah L. Elson, Pierre Fontanillas, Nicholas A. Furlotte, Jennifer C. McCreight,  
1439 Karen E. Huber, Nadia K. Litterman, Matthew H. McIntyre, Joanna L. Mountain, Elizabeth S.  
1440 Noblin, Carrie A.M. Northover, Steven J. Pitts, J. Fah Sathirapongsasuti, Olga V. Sazonova,  
1441 Janie F. Shelton, Suyash Shringarpure, Chao Tian, Joyce Y. Tung, Vladimir Vacic, and  
1442 Catherine H. Wilson.

1443

1444 **References**

- 1445 1. World Health Organization. Consensus development conference: Prophylaxis and  
1446 treatment of osteoporosis. *Osteoporos. Int.* **1**, 114–117 (1991).
- 1447 2. Richards, J. B., Zheng, H.-F. & Spector, T. D. Genetics of osteoporosis from genome-  
1448 wide association studies: advances and challenges. *Nat. Rev. Genet.* **13**, 576–588  
1449 (2012).
- 1450 3. Johnell, O. *et al.* Predictive value of BMD for hip and other fractures. *J. Bone Miner. Res.*  
1451 **20**, 1185–1194 (2005).
- 1452 4. Kemp, J. P. *et al.* Identification of 153 new loci associated with heel bone mineral density  
1453 and functional involvement of GPC6 in osteoporosis. *Nat. Genet.* **49**, 1468–1475 (2017).
- 1454 5. Arden, N. K., Baker, J., Hogg, C., Baan, K. & Spector, T. D. The heritability of bone  
1455 mineral density, ultrasound of the calcaneus and hip axis length: a study of  
1456 postmenopausal twins. *J. Bone Miner. Res.* **11**, 530–534 (1996).
- 1457 6. Hunter, D. J. *et al.* Genetic variation in bone mineral density and calcaneal ultrasound: A  
1458 study of the influence of menopause using female twins. *Osteoporos. Int.* **12**, 406–411  
1459 (2001).
- 1460 7. Bauer, D. C. Broadband Ultrasound Attenuation Predicts Fractures Strongly and  
1461 Independently of Densitometry in Older Women. *Arch. Intern. Med.* **157**, 629 (1997).
- 1462 8. Bauer, D. C. *et al.* Quantitative ultrasound predicts hip and non-spine fracture in men:  
1463 The MrOS study. *Osteoporos. Int.* **18**, 771–777 (2007).
- 1464 9. Karasik, D. *et al.* Mapping of quantitative ultrasound of the calcaneus bone to  
1465 chromosome 1 by genome-wide linkage analysis. *Osteoporos. Int.* **13**, 796–802 (2002).
- 1466 10. Medina-Gomez, C. *et al.* Life-Course Genome-wide Association Study Meta-analysis of  
1467 Total Body BMD and Assessment of Age-Specific Effects. *Am. J. Hum. Genet.* **102**, 88–  
1468 102 (2018).
- 1469 11. McCloskey, E. V. *et al.* Predictive ability of heel quantitative ultrasound for incident  
1470 fractures: an individual-level meta-analysis. *Osteoporos. Int.* **26**, 1979–1987 (2015).
- 1471 12. Timpson, N. J., Greenwood, C. M. T., Soranzo, N., Lawson, D. J. & Richards, J. B.  
1472 Genetic architecture: The shape of the genetic contribution to human traits and disease.  
1473 *Nat. Rev. Genet.* **19**, 110–124 (2018).
- 1474 13. Eriksson, A. L. *et al.* Genetic Determinants of Circulating Estrogen Levels, and Evidence  
1475 of a Causal Effect of Estradiol on Bone Density in Men. *J. Clin. Endocrinol. Metab.*  
1476 (2018). doi:10.1210/jc.2017-02060
- 1477 14. Ohlsson, C. *et al.* Genetic determinants of serum testosterone concentrations in men.  
1478 *PLoS Genet.* **7**, e1002313 (2011).
- 1479 15. Yong, W. *et al.* Essential role for co-chaperone Fkbp52 but not Fkbp51 in androgen  
1480 receptor-mediated signaling and physiology. *J. Biol. Chem.* **282**, 5026–5036 (2007).
- 1481 16. He, C. *et al.* Genome-wide association studies identify loci associated with age at  
1482 menarche and age at natural menopause. *Nat. Genet.* **41**, 724–728 (2009).
- 1483 17. Bulik-Sullivan, B. *et al.* An atlas of genetic correlations across human diseases and traits.  
1484 *Nat. Genet.* **47**, 1236–1241 (2015).
- 1485 18. McLaren, W. *et al.* The Ensembl Variant Effect Predictor. *Genome Biol.* **17**, 122 (2016).
- 1486 19. Yang, J. *et al.* Conditional and joint multiple-SNP analysis of GWAS summary statistics  
1487 identifies additional variants influencing complex traits. *Nat. Genet.* **44**, 369–375 (2012).
- 1488 20. Benner, C. *et al.* FINEMAP: Efficient variable selection using summary data from  
1489 genome-wide association studies. *Bioinformatics* **32**, 1493–1501 (2016).
- 1490 21. Thurman, R. E. *et al.* The accessible chromatin landscape of the human genome. *Nature*  
1491 **489**, 75–82 (2012).
- 1492 22. Rivadeneira, F. & Mäkitie, O. Osteoporosis and Bone Mass Disorders: From Gene  
1493 Pathways to Treatments. *Trends Endocrinol. Metab.* **27**, 262–281 (2016).
- 1494 23. Watanabe, K., Taskesen, E., Van Bochoven, A. & Posthuma, D. Functional mapping and

- 1495 annotation of genetic associations with FUMA. *Nat. Commun.* **8**, 1826 (2017).
- 1496 24. Kutmon, M. *et al.* WikiPathways: Capturing the full diversity of pathway knowledge.
- 1497 *Nucleic Acids Res.* **44**, D488–D494 (2016).
- 1498 25. Dallas, S. L. & Bonewald, L. F. Dynamics of the transition from osteoblast to osteocyte.
- 1499 *Ann. N. Y. Acad. Sci.* **1192**, 437–443 (2010).
- 1500 26. Youlten, S. *et al.* Osteocytes express a unique transcriptome that underpins skeletal
- 1501 homeostasis. in *American Society of Bone and Mineral Research* (2017).
- 1502 27. Lee, H. K. & Deneen, B. Daam2 Is Required for Dorsal Patterning via Modulation of
- 1503 Canonical Wnt Signaling in the Developing Spinal Cord. *Dev. Cell* **22**, 183–196 (2012).
- 1504 28. Lee, H. K. *et al.* Daam2-PIP5K Is a Regulatory Pathway for Wnt Signaling and
- 1505 Therapeutic Target for Remyelination in the CNS. *Neuron* **85**, 1227–1243 (2015).
- 1506 29. Donnelly, E., Chen, D. X., Boskey, A. L., Baker, S. P. & Van Der Meulen, M. C. H.
- 1507 Contribution of mineral to bone structural behavior and tissue mechanical properties.
- 1508 *Calcif. Tissue Int.* **87**, 450–460 (2010).
- 1509 30. Bannister, A. J. *et al.* Selective recognition of methylated lysine 9 on histone H3 by the
- 1510 HP1 chromo domain. *Nature* **410**, 120–124 (2001).
- 1511 31. De Santo, C. *et al.* WAC loss-of-function mutations cause a recognisable syndrome
- 1512 characterised by dysmorphic features, developmental delay and hypotonia and
- 1513 recapitulate 10p11.23 microdeletion syndrome. *J. Med. Genet.* **52**, 754–761 (2015).
- 1514 32. Bermudez, V. P. *et al.* The alternative Ctf18-Dcc1-Ctf8-replication factor C complex
- 1515 required for sister chromatid cohesion loads proliferating cell nuclear antigen onto DNA.
- 1516 *Proc. Natl. Acad. Sci.* **100**, 10237–10242 (2003).
- 1517 33. Saigusa, K. *et al.* RGC32, a novel p53-inducible gene, is located on centrosomes during
- 1518 mitosis and results in G2/M arrest. *Oncogene* **26**, 1110–1121 (2007).
- 1519 34. Nefla, M. *et al.* The pro-inflammatory cytokine 14-3-3 is a ligand of CD13 in cartilage. *J.*
- 1520 *Cell Sci.* **128**, 3250–3262 (2015).
- 1521 35. Nagamani, S. C. S. *et al.* Microdeletions including YWHAE in the Miller-Dieker syndrome
- 1522 region on chromosome 17p13.3 result in facial dysmorphisms, growth restriction, and
- 1523 cognitive impairment. *J. Med. Genet.* **46**, 825–833 (2009).
- 1524 36. Visscher, P. M. *et al.* 10 Years of GWAS Discovery: Biology, Function, and Translation.
- 1525 *Am. J. Hum. Genet.* **101**, 5–22 (2017).
- 1526 37. Nelson, M. R. *et al.* The support of human genetic evidence for approved drug
- 1527 indications. *Nat. Genet.* **47**, 856–860 (2015).
- 1528 38. Bone, H. G. *et al.* 10 years of denosumab treatment in postmenopausal women with
- 1529 osteoporosis: results from the phase 3 randomised FREEDOM trial and open-label
- 1530 extension. *Lancet Diabetes Endocrinol.* **5**, 513–523 (2017).
- 1531 39. Lawlor, D. A., Tilling, K. & Smith, G. D. Triangulation in aetiological epidemiology. *Int. J.*
- 1532 *Epidemiol.* **45**, 1866–1886 (2016).
- 1533 40. Moayeri, A. *et al.* Quantitative ultrasound of the heel and fracture risk assessment: An
- 1534 updated meta-analysis. *Osteoporos. Int.* **23**, 143–153 (2012).
- 1535 41. Grundberg, E. *et al.* Population genomics in a disease targeted primary cell model.
- 1536 *Genome Res.* **19**, 1942–1952 (2009).
- 1537 42. Sudlow, C. *et al.* UK Biobank: An Open Access Resource for Identifying the Causes of a
- 1538 Wide Range of Complex Diseases of Middle and Old Age. *PLoS Med.* **12**, e1001779
- 1539 (2015).
- 1540 43. McCarthy, S. *et al.* A reference panel of 64,976 haplotypes for genotype imputation. *Nat.*
- 1541 *Genet.* **48**, 1279–1283 (2016).
- 1542 44. Bycroft, C. *et al.* Genome-wide genetic data on ~500,000 UK Biobank participants.
- 1543 *bioRxiv* <https://doi.org/10.1101/166298> (2017). doi:10.1101/166298
- 1544 45. Auton, A. *et al.* A global reference for human genetic variation. *Nature* **526**, 68–74 (2015).
- 1545 46. Galinsky, K. J. *et al.* Fast Principal-Component Analysis Reveals Convergent Evolution of

- 1546 ADH1B in Europe and East Asia. *Am. J. Hum. Genet.* **98**, 456–472 (2016).
- 1547 47. Altshuler, D. M. *et al.* Integrating common and rare genetic variation in diverse human  
1548 populations. *Nature* **467**, 52–58 (2010).
- 1549 48. Chen, W.-C. & Maitra, R. EM Algorithm for Model-Based Clustering of Finite Mixture  
1550 Gaussian Distribution. R package (2015).
- 1551 49. Yang, J., Lee, S. H., Goddard, M. E. & Visscher, P. M. GCTA: A tool for genome-wide  
1552 complex trait analysis. *Am. J. Hum. Genet.* **88**, 76–82 (2011).
- 1553 50. Loh, P. R. *et al.* Efficient Bayesian mixed-model analysis increases association power in  
1554 large cohorts. *Nat. Genet.* **47**, 284–290 (2015).
- 1555 51. Chang, C. C. *et al.* Second-generation PLINK: Rising to the challenge of larger and richer  
1556 datasets. *Gigascience* **4**, 7 (2015).
- 1557 52. Winkler, T. W. *et al.* EasyStrata: Evaluation and visualization of stratified genome-wide  
1558 association meta-Analysis data. *Bioinformatics* **31**, 259–261 (2015).
- 1559 53. Cochran, W. G. The Combination of Estimates from Different Experiments. *Biometrics* **10**,  
1560 101 (1954).
- 1561 54. Willer, C. J., Li, Y. & Abecasis, G. R. METAL: Fast and efficient meta-analysis of  
1562 genomewide association scans. *Bioinformatics* **26**, 2190–2191 (2010).
- 1563 55. Quinlan, A. R. & Hall, I. M. BEDTools: A flexible suite of utilities for comparing genomic  
1564 features. *Bioinformatics* **26**, 841–842 (2010).
- 1565 56. Bulik-Sullivan, B. *et al.* LD score regression distinguishes confounding from polygenicity  
1566 in genome-wide association studies. *Nat. Genet.* **47**, 291–295 (2015).
- 1567 57. Witte, J. S., Visscher, P. M. & Wray, N. R. The contribution of genetic variants to disease  
1568 depends on the ruler. *Nat. Rev. Genet.* **15**, 765–776 (2014).
- 1569 58. Chapman, J. M., Cooper, J. D., Todd, J. A. & Clayton, D. G. Detecting disease  
1570 associations due to linkage disequilibrium using haplotype tags: A class of tests and the  
1571 determinants of statistical power. *Hum. Hered.* **56**, 18–31 (2003).
- 1572 59. Spencer, C. C. A., Su, Z., Donnelly, P. & Marchini, J. Designing genome-wide association  
1573 studies: Sample size, power, imputation, and the choice of genotyping chip. *PLoS Genet.*  
1574 **5**, e1000477 (2009).
- 1575 60. Finucane, H. K. *et al.* Partitioning heritability by functional annotation using genome-wide  
1576 association summary statistics. *Nat. Genet.* **47**, 1228–1235 (2015).
- 1577 61. Benner, C. *et al.* Prospects of Fine-Mapping Trait-Associated Genomic Regions by Using  
1578 Summary Statistics from Genome-wide Association Studies. *Am. J. Hum. Genet.* **101**,  
1579 539–551 (2017).
- 1580 62. Hart, T., Komori, H. K., LaMere, S., Podshivalova, K. & Salomon, D. R. Finding the active  
1581 genes in deep RNA-seq gene expression studies. *BMC Genomics* **14**, 778 (2013).
- 1582 63. Buenrostro, J. D., Giresi, P. G., Zaba, L. C., Chang, H. Y. & Greenleaf, W. J.  
1583 Transposition of native chromatin for fast and sensitive epigenomic profiling of open  
1584 chromatin, DNA-binding proteins and nucleosome position. *Nat. Methods* **10**, 1213–1218  
1585 (2013).
- 1586 64. Bolger, A. M., Lohse, M. & Usadel, B. Trimmomatic: A flexible trimmer for Illumina  
1587 sequence data. *Bioinformatics* **30**, 2114–2120 (2014).
- 1588 65. Dobin, A. *et al.* STAR: Ultrafast universal RNA-seq aligner. *Bioinformatics* **29**, 15–21  
1589 (2013).
- 1590 66. Anders, S., Pyl, P. T. & Huber, W. HTSeq-A Python framework to work with high-  
1591 throughput sequencing data. *Bioinformatics* **31**, 166–169 (2015).
- 1592 67. Kalajzic, I. *et al.* Expression profile of osteoblast lineage at defined stages of  
1593 differentiation. *J. Biol. Chem.* **280**, 24618–24626 (2005).
- 1594 68. Schmitt, A. D. *et al.* A Compendium of Chromatin Contact Maps Reveals Spatially Active  
1595 Regions in the Human Genome. *Cell Rep.* **17**, 2042–2059 (2016).
- 1596 69. Rao, S. S. P. *et al.* A 3D map of the human genome at kilobase resolution reveals



- 1597 principles of chromatin looping. *Cell* **159**, 1665–1680 (2014).
- 1598 70. Belaghzal, H., Dekker, J. & Gibcus, J. H. Hi-C 2.0: An optimized Hi-C procedure for high-  
1599 resolution genome-wide mapping of chromosome conformation. *Methods* **123**, 56–65  
1600 (2017).
- 1601 71. Servant, N. *et al.* HiC-Pro: An optimized and flexible pipeline for Hi-C data processing.  
1602 *Genome Biol.* **16**, 259 (2015).
- 1603 72. Heinz, S. *et al.* Simple Combinations of Lineage-Determining Transcription Factors Prime  
1604 cis-Regulatory Elements Required for Macrophage and B Cell Identities. *Mol. Cell* **38**,  
1605 576–589 (2010).
- 1606 73. Mifsud, B. *et al.* GOTHIC, a probabilistic model to resolve complex biases and to identify  
1607 real interactions in Hi-C data. *PLoS One* **12**, e0174744 (2017).
- 1608 74. Durand, N. C. *et al.* Juicer Provides a One-Click System for Analyzing Loop-Resolution  
1609 Hi-C Experiments. *Cell Syst.* **3**, 95–98 (2016).
- 1610 75. Doench, J. G. *et al.* Optimized sgRNA design to maximize activity and minimize off-target  
1611 effects of CRISPR-Cas9. *Nat. Biotechnol.* **34**, 184–191 (2016).
- 1612 76. Haeussler, M. *et al.* Evaluation of off-target and on-target scoring algorithms and  
1613 integration into the guide RNA selection tool CRISPOR. *Genome Biol.* **17**, 148 (2016).
- 1614 77. Bassett, J. H. D. *et al.* Rapid-Throughput Skeletal Phenotyping of 100 Knockout Mice  
1615 Identifies 9 New Genes That Determine Bone Strength. *PLoS Genet.* **8**, e1002858  
1616 (2012).
- 1617 78. Bassett, J. H. D., Van Der Spek, A., Gogakos, A. & Williams, G. R. Quantitative X-ray  
1618 imaging of rodent bone by faxitron. *Methods Mol. Biol.* **816**, 499–506 (2012).
- 1619 79. Bassett, J. H. D. *et al.* Optimal bone strength and mineralization requires the type 2  
1620 iodothyronine deiodinase in osteoblasts. *Proc. Natl. Acad. Sci.* **107**, 7604–7609 (2010).
- 1621 80. Esapa, C. T. *et al.* Bone Mineral Content and Density. *Curr. Protoc. Mouse Biol.* **2**, 365–  
1622 400 (2012).
- 1623 81. Bassett, J. H. D. *et al.* Thyrostimulin regulates osteoblastic bone formation during early  
1624 skeletal development. *Endocrinology* **156**, 3098–3113 (2015).
- 1625 82. Quinn, J. M. W. *et al.* Calcitonin receptor antibodies in the identification of osteoclasts.  
1626 *Bone* **25**, 1–8 (1999).
- 1627 83. Lee, N. J. *et al.* Critical role for Y1 receptors in mesenchymal progenitor cell  
1628 differentiation and osteoblast activity. *J. Bone Miner. Res.* **25**, 1736–1747 (2010).
- 1629 84. Gourion-Arsiquaud, S., West, P. A. & Boskey, A. L. Fourier transform-infrared  
1630 microspectroscopy and microscopic imaging. *Methods Mol. Biol.* **455**, 293–303 (2008).
- 1631

Figure 1

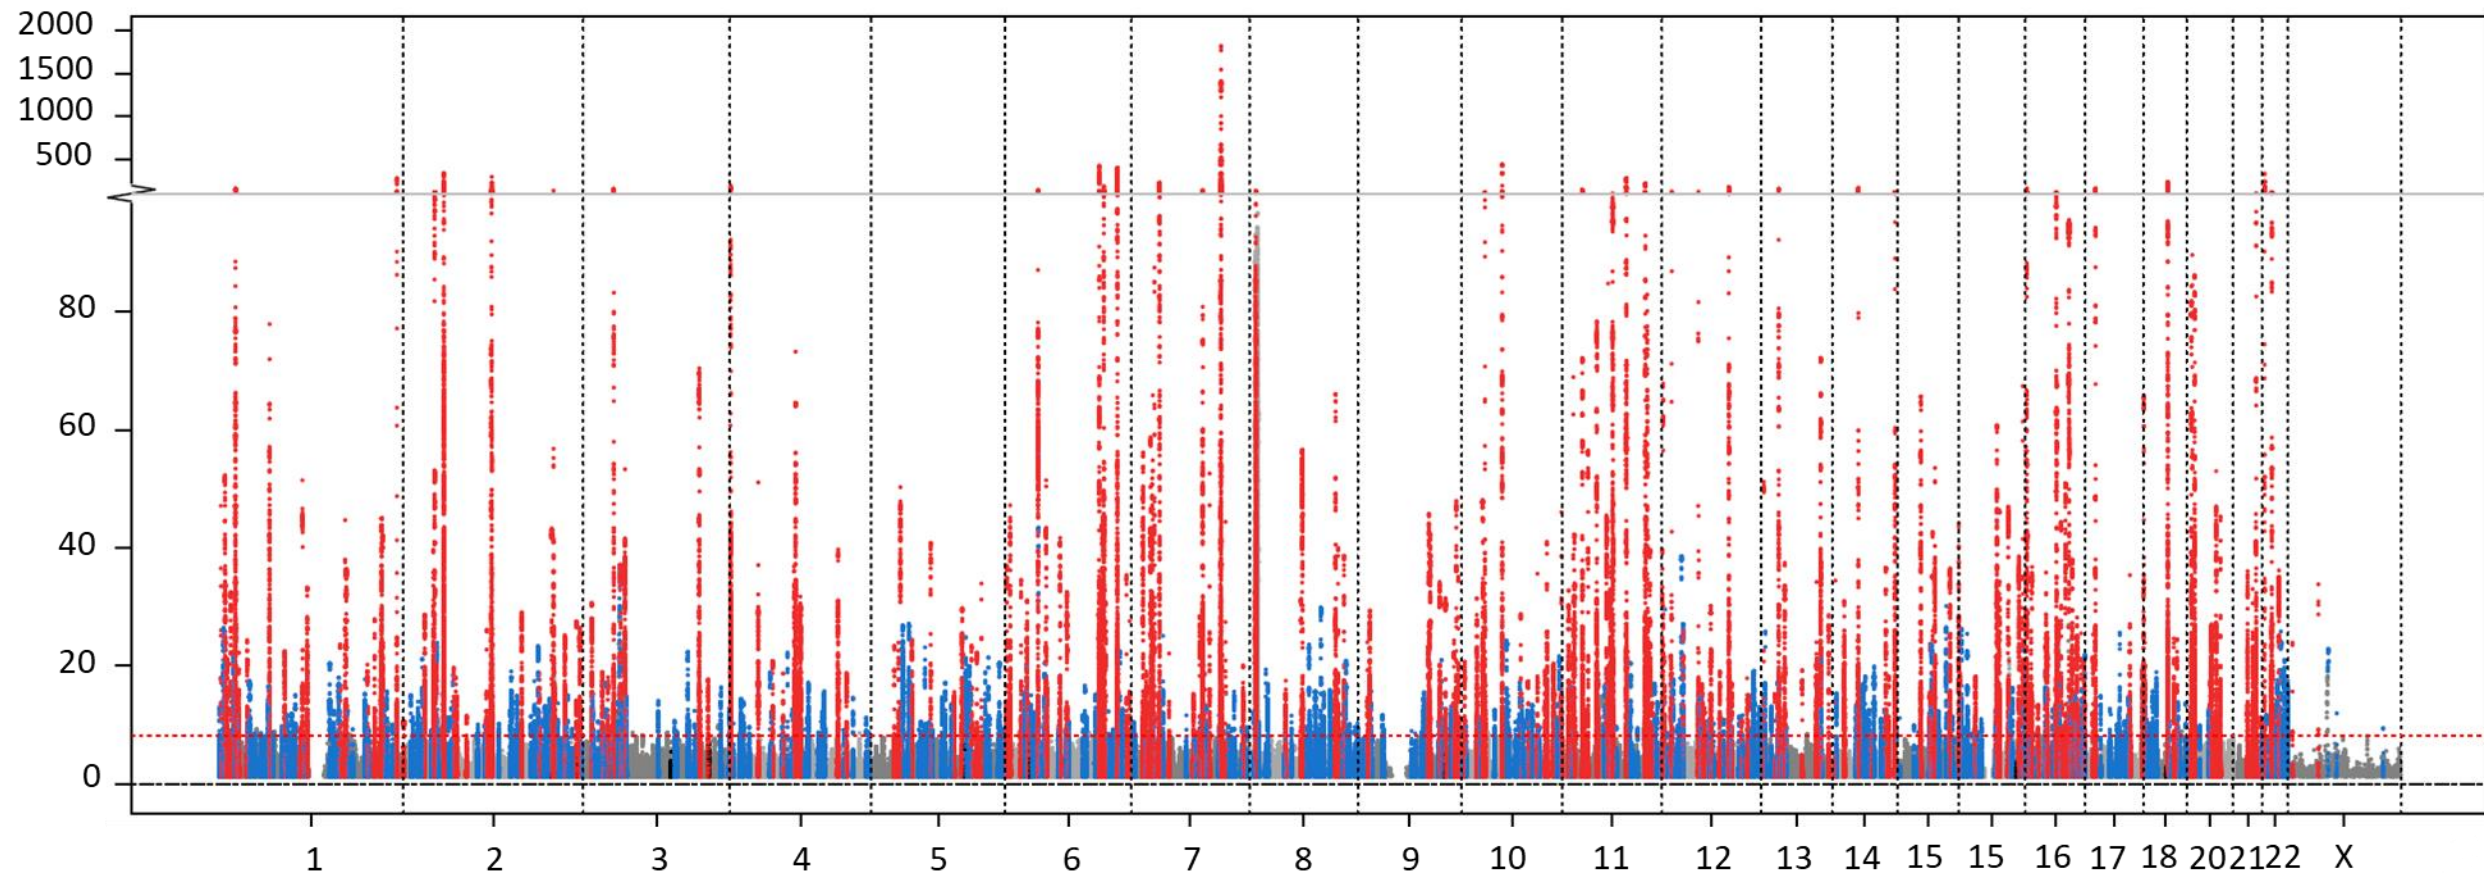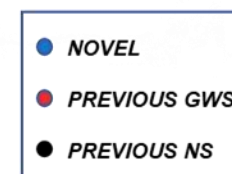

Figure 2

a

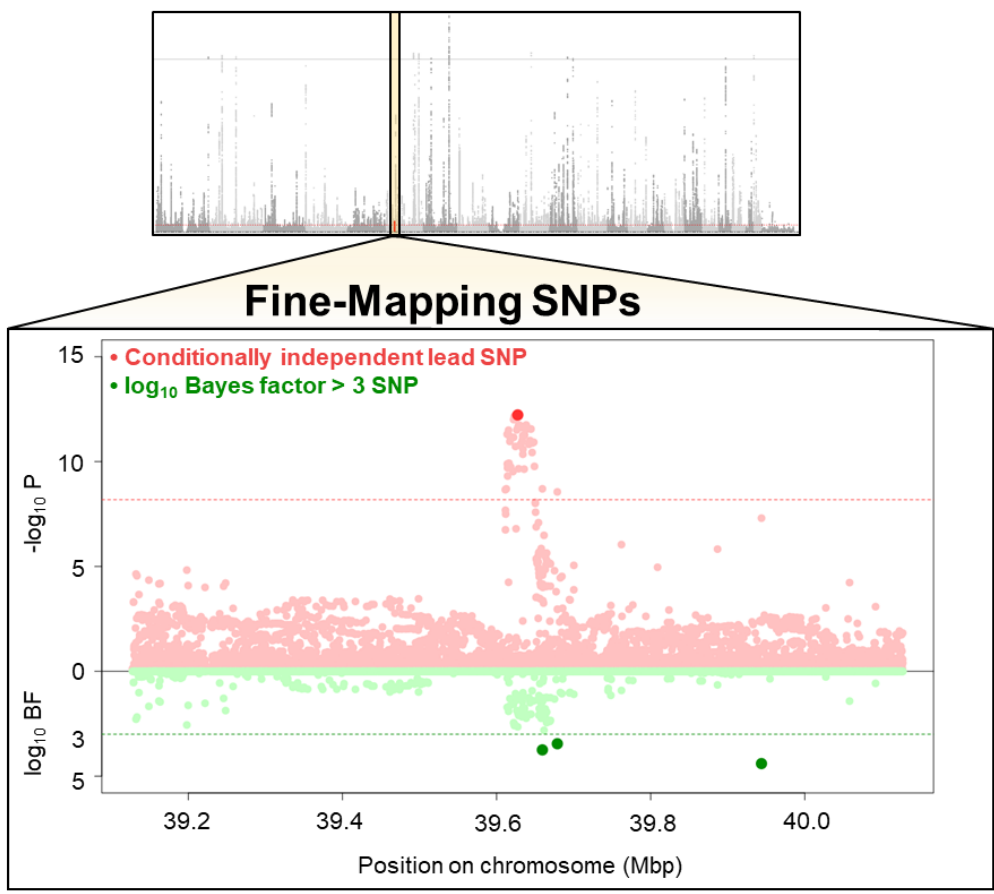

b

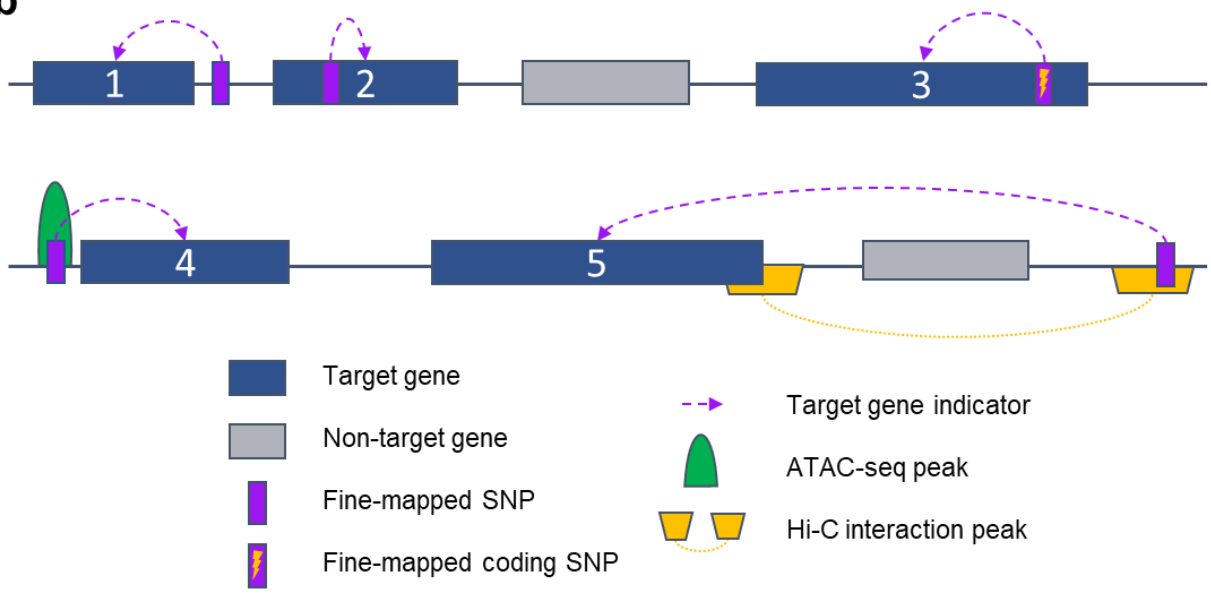

Figure 3

**a**

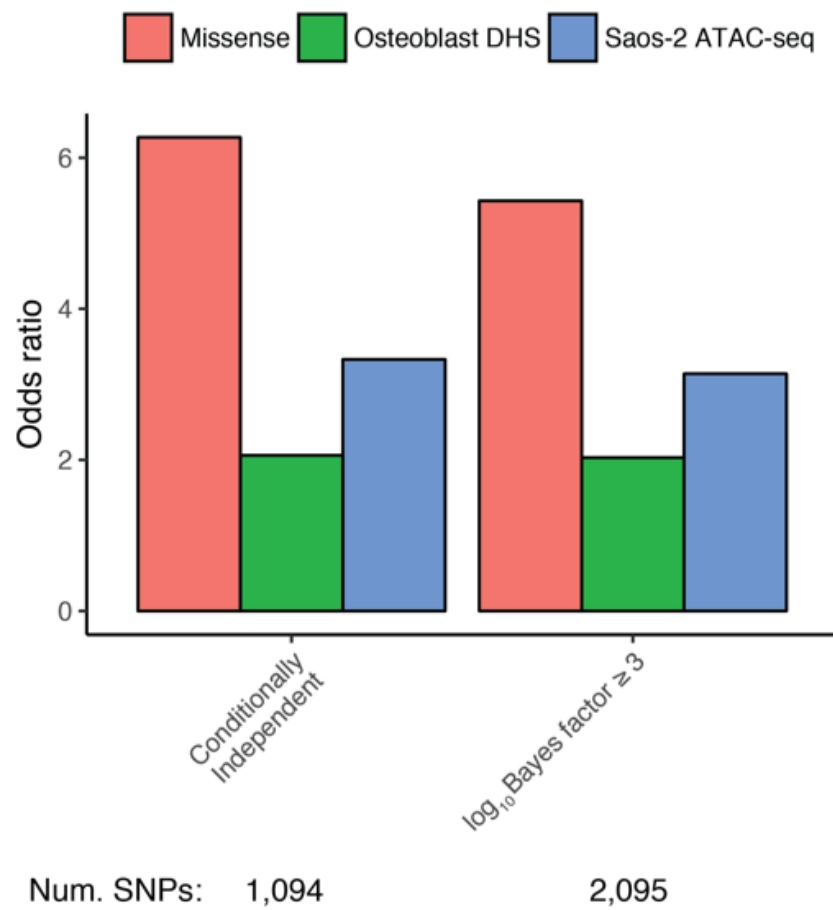

**b**

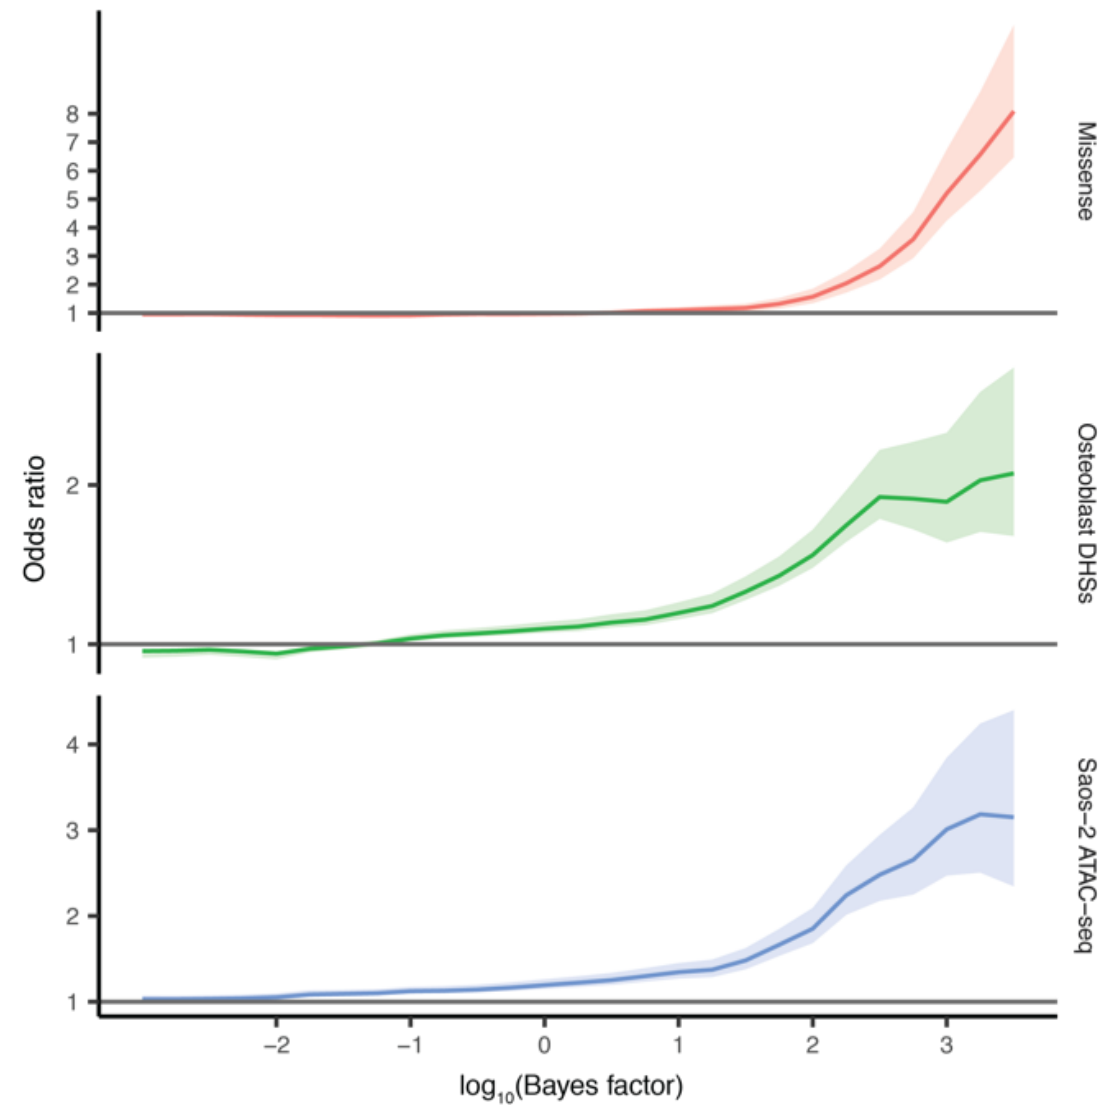



Figure 4

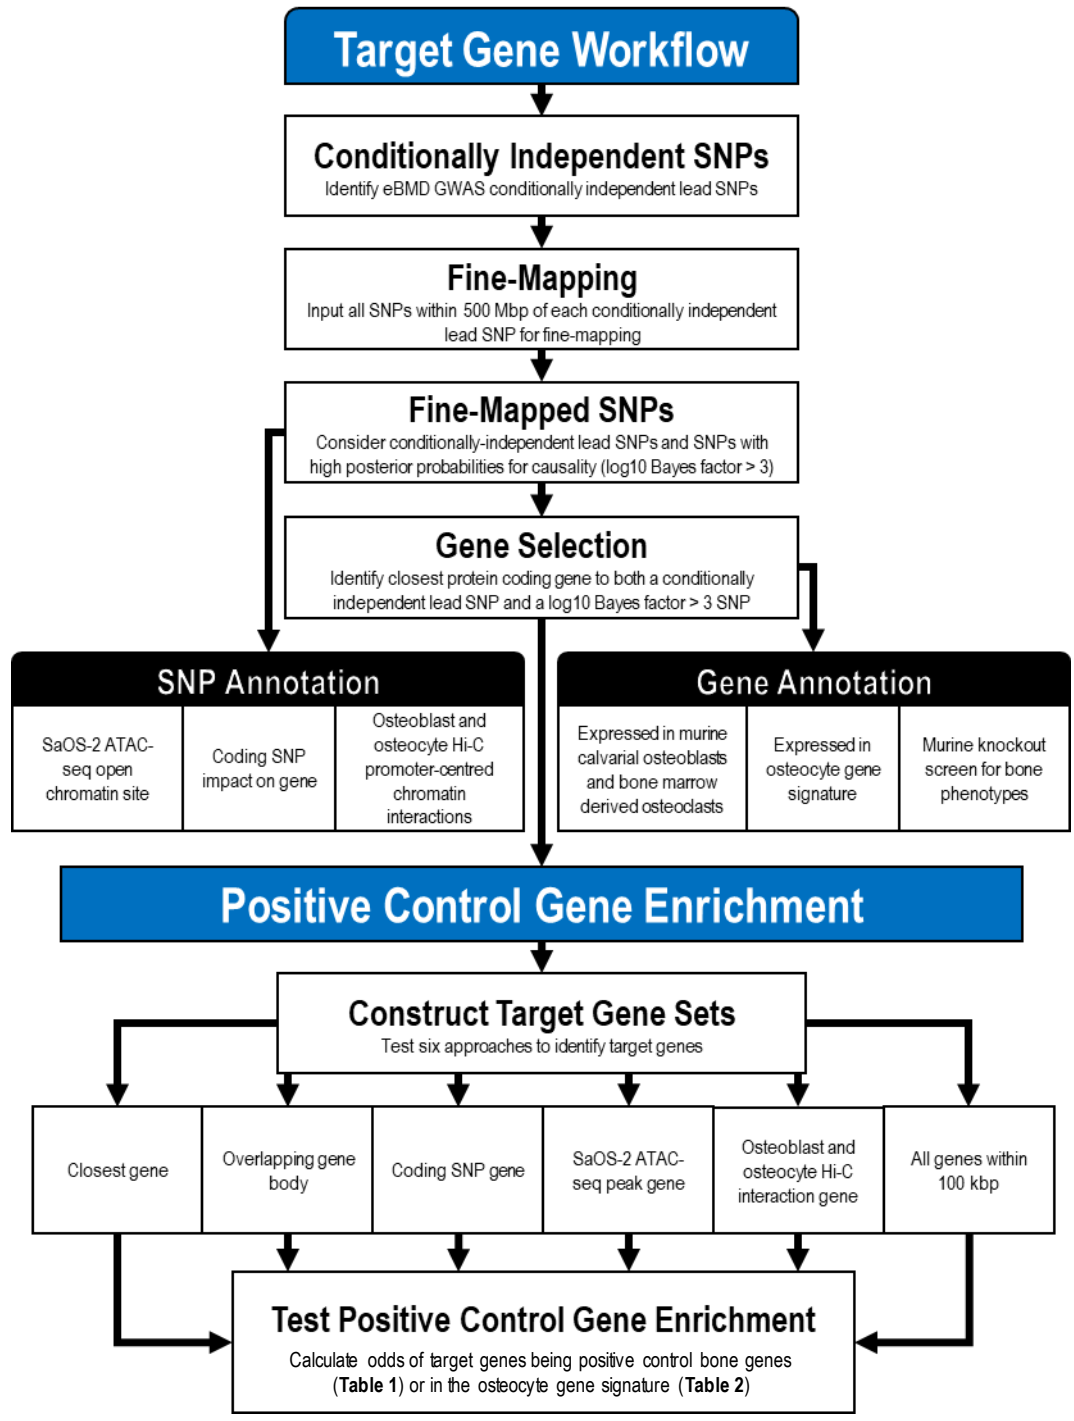

Figure 5

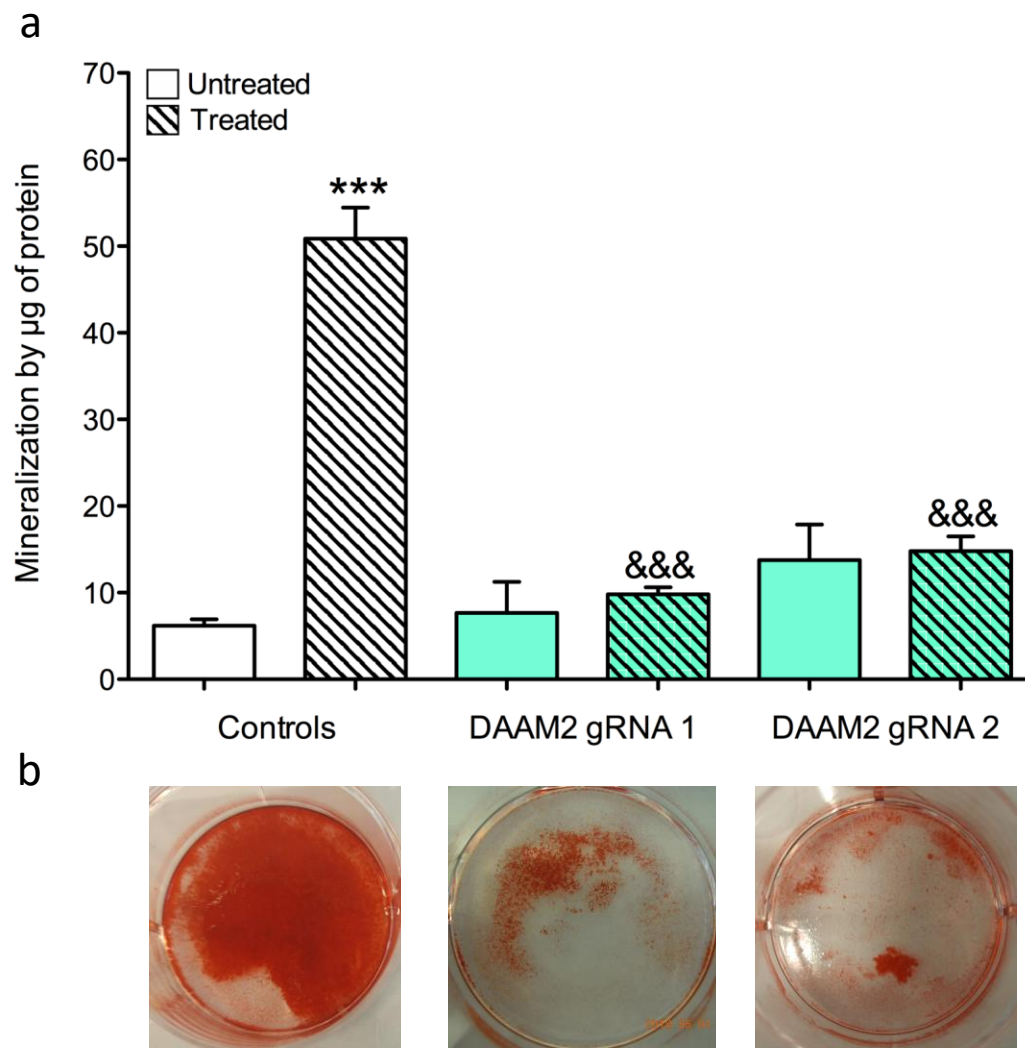

Figure 6

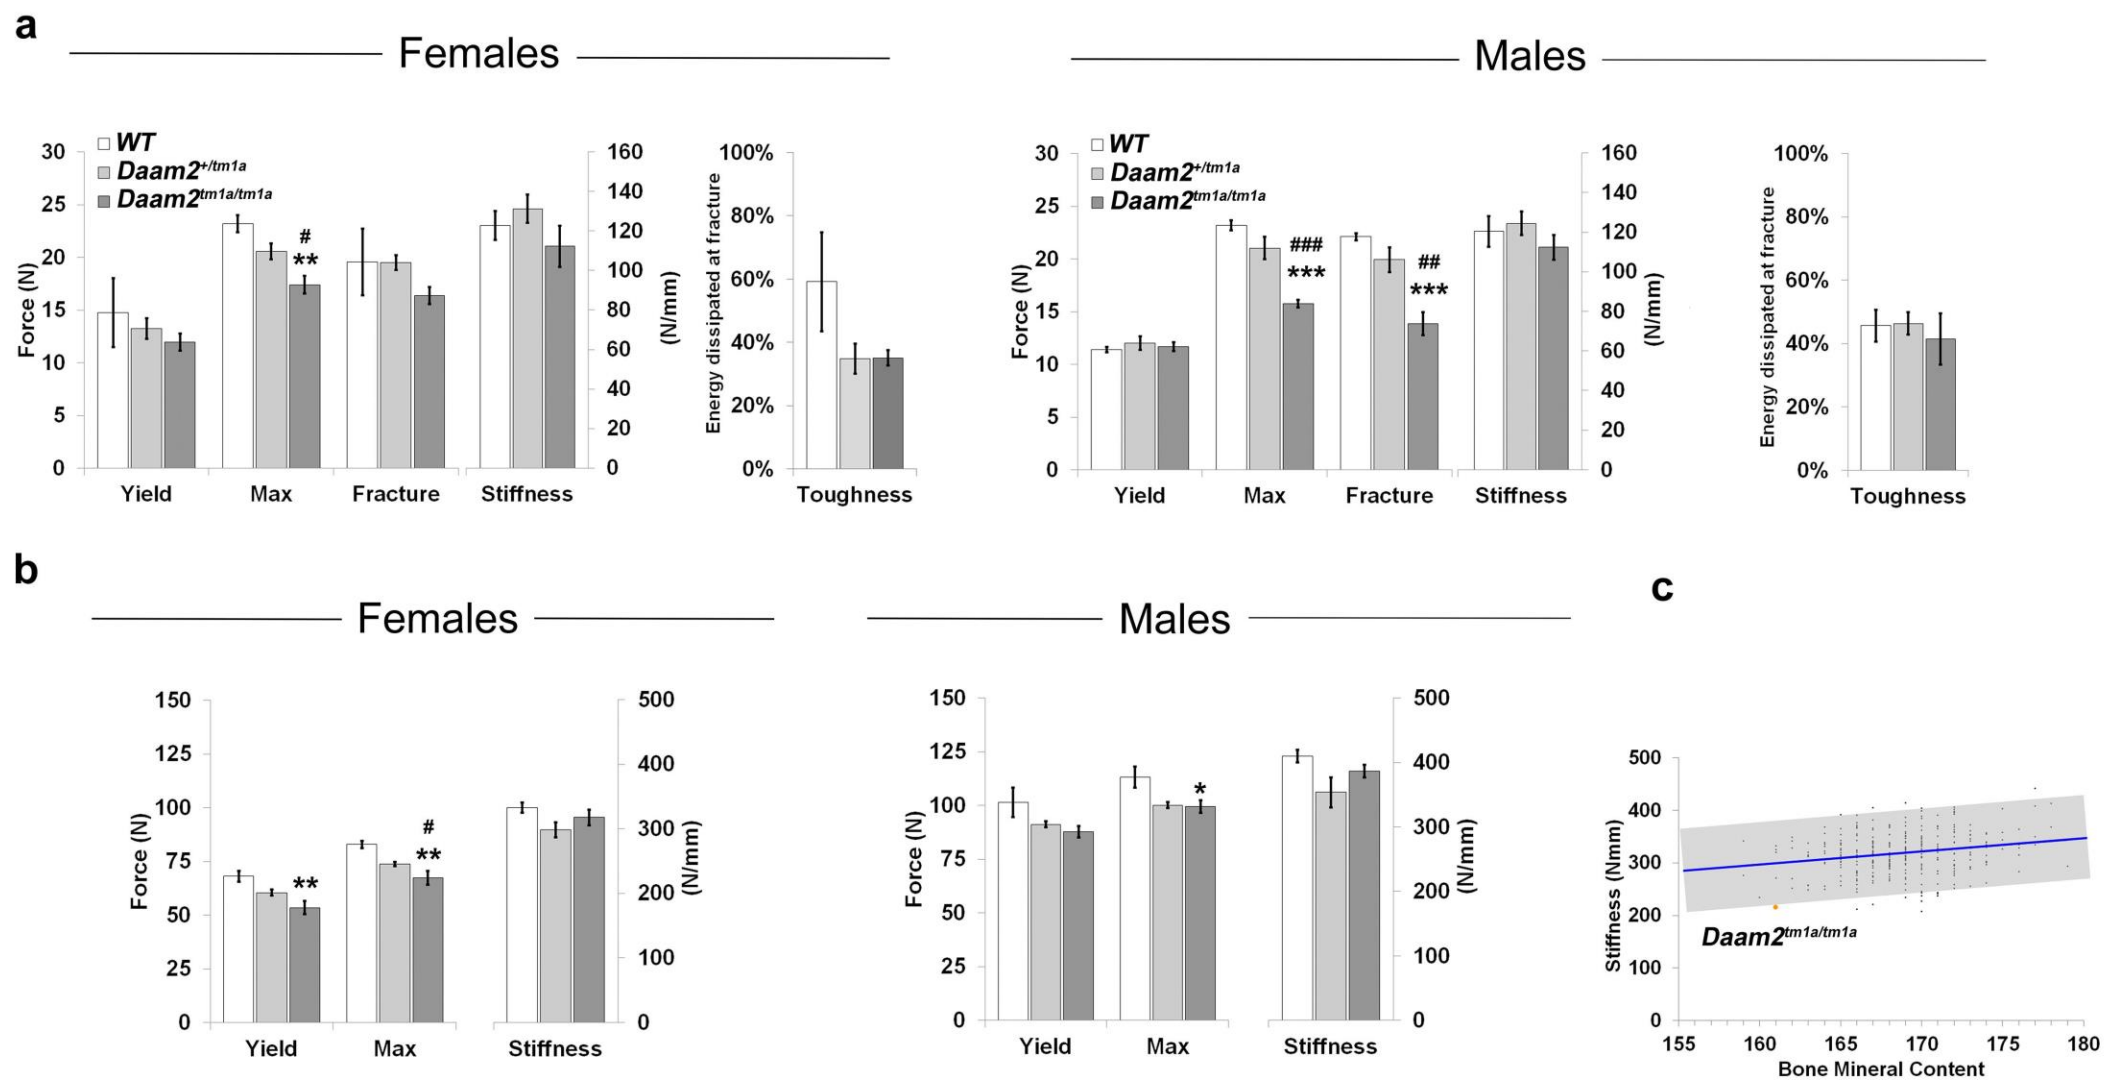

Source: https://www.biorxiv.org/content/10.1101/338863v2.full.pdf
